# Supplementary material
Source: PubMed Central journal article supplement (PMC5952386)
Supplement: JB.00745-17_zjb011184764s1.pdf [file JB.00745-17_zjb011184764s1.pdf]

# SUPPLEMENTAL MATERIAL

## The Opp (AmiACDEF) Oligopeptide Transporter Mediates Resistance of Serotype 2 *Streptococcus pneumoniae* D39 to Killing by Chemokine CXCL10 and Other Antimicrobial Peptides

Kevin E. Bruce<sup>1</sup>, Britta E. Rued<sup>1</sup>, Ho-Ching Tiffany Tsui<sup>1\*</sup>,  
and Malcolm E. Winkler<sup>1\*</sup>

<sup>1</sup>Department of Biology, Indiana University Bloomington (IUB), Bloomington, IN 47405 USA

\*Corresponding author:  
Malcolm E. Winkler  
Phone: 812-856-1318  
E-mail: winklerm@indiana.edu

\*Co-corresponding author:  
Ho-Ching Tiffany Tsui  
Phone: 812-856-1781  
E-mail: ttttsui@indiana.edu

### SUPPLEMENTAL TABLES

**Table S1.** Bacterial strains and oligonucleotide primers used in this study

**Table S2.** IC<sub>50</sub> of *S. pneumoniae* D39 cells treated with CXCL10, LL-37, or nisin under various conditions

**Table S3.** IC<sub>50</sub> of chemokine-treated *Bacillus subtilis* under various conditions

**Table S4.** IC<sub>50</sub> of N-terminal CXCL10-treated *S. pneumoniae* cells with a CFU survival assay in TGS buffer

### SUPPLEMENTAL FIGURE LEGENDS.

**Fig. S1.** *S. pneumoniae* cells in TGS are sensitive to CXCL10 in the 0.03 to 0.06 μM range

**Fig. S2.** Unencapsulated *S. pneumoniae* D39 show significant decreases in CFUs and low fluorescence after incubation in NPB

**Fig. S3.** The fluorescence-based antimicrobial assay for IC<sub>50</sub> determination is not dependent on the basal level of fluorescence signal generated by untreated bacteria

**Fig. S4.** The Δ*amiA-F* clean deletion mutant phenocopies the Δ*amiA-F*:P<sub>C</sub>-*aad9* strain, and the Δ*amiA-F* mutation is responsible for the phenotype seen in the ΔOPT mutant, and CXCL10 killing of the Δ*amiA-F* strain is consistent with both fluorescence-based and CFU survival assays

**Fig. S5.** *Spn* D39 Δ*amiA-F* mutants in NPB are more resistant to nisin, whereas *Spn* D39 Δ*dlt* and *Spn* TIGR4 are more sensitive to LL-37 and nisin relative to *Spn* D39

**Fig. S6.** Sensitivity to CXCL10 and dose response curves of *S. mitis*, *S. sanguinis*, and *S. mutans* to LL-37

**Fig. S7.** Δ*ftsX* and Δ*ftsE* mutants of *B. subtilis* show similar IC<sub>50</sub> values to CXCL10 or N-CXCL10 as the *ftsE*<sup>+</sup> *ftsX*<sup>+</sup> parent

**Fig. S8.** CXCL10 does not show antimicrobial activity against *Spn* D39 in DMEM ± 10% (vol/vol) FBS

### SUPPLEMENTAL REFERENCES

**Table S1.** Bacterial strains and oligonucleotide primers used in this study

| <b><i>Streptococcus pneumoniae</i> strains used in this study</b> |                                                                                                                                                                                                                                                    |                                     |                     |
|-------------------------------------------------------------------|----------------------------------------------------------------------------------------------------------------------------------------------------------------------------------------------------------------------------------------------------|-------------------------------------|---------------------|
| Strain Number                                                     | Genotype (description)                                                                                                                                                                                                                             | Antibiotic resistance <sup>a</sup>  | Reference or source |
| IU1686                                                            | TIGR4 [JNR.7/87]                                                                                                                                                                                                                                   | None                                | ATCC                |
| IU1690                                                            | D39                                                                                                                                                                                                                                                | None                                | (1)                 |
| IU1781                                                            | D39 <i>rpsL1</i>                                                                                                                                                                                                                                   | Str <sup>R</sup>                    | (2)                 |
| IU1945                                                            | D39 $\Delta$ <i>cps2A'</i> - <i>cps2H'</i> = D39 $\Delta$ <i>cps</i>                                                                                                                                                                               | None                                | (1)                 |
| IU3309                                                            | D39 <i>rpsL1 cps2E</i> ( $\Delta$ A); <i>cps2E</i> has a $\Delta$ A frameshift at codon 326                                                                                                                                                        | Str <sup>R</sup>                    | (2)                 |
| IU4325                                                            | D39 $\Delta$ <i>cps rpsL1 ftsEX</i> <sup>+</sup> P <sub>c</sub> -[ <i>kan-rpsL</i> <sup>+</sup> ]                                                                                                                                                  | Kan <sup>R</sup> , Str <sup>S</sup> | (3)                 |
| IU6220                                                            | D39 $\Delta$ <i>cps ftsX</i> (S161Y) P <sub>c</sub> -[ <i>kan-rpsL</i> <sup>+</sup> ] (IU1945 X <i>ftsEX</i> P <sub>c</sub> -[ <i>kan-rpsL</i> <sup>+</sup> ] error-prone amplicon)                                                                | Kan <sup>R</sup>                    | This study          |
| IU6234                                                            | D39 $\Delta$ <i>cps ftsX</i> (D129V) P <sub>c</sub> -[ <i>kan-rpsL</i> <sup>+</sup> ] (IU1945 X <i>ftsEX</i> P <sub>c</sub> -[ <i>kan-rpsL</i> <sup>+</sup> ] error-prone amplicon)                                                                | Kan <sup>R</sup>                    | This study          |
| IU6236                                                            | D39 $\Delta$ <i>cps ftsX</i> (N269T) P <sub>c</sub> -[ <i>kan-rpsL</i> <sup>+</sup> ] (IU1945 X <i>ftsEX</i> P <sub>c</sub> -[ <i>kan-rpsL</i> <sup>+</sup> ] error-prone amplicon)                                                                | Kan <sup>R</sup>                    | This study          |
| IU6237                                                            | D39 $\Delta$ <i>cps ftsX</i> (F45I, K95M, E117K, V139A, E213V) P <sub>c</sub> -[ <i>kan-rpsL</i> <sup>+</sup> ] (IU1945 X <i>ftsEX</i> P <sub>c</sub> -[ <i>kan-rpsL</i> <sup>+</sup> ] error-prone amplicon)                                      | Kan <sup>R</sup>                    | This study          |
| IU6321                                                            | D39 $\Delta$ <i>cps pcsB</i> (A160P) P <sub>c</sub> - <i>erm ftsX</i> (W183L) P <sub>c</sub> -[ <i>kan-rpsL</i> <sup>+</sup> ]                                                                                                                     | Kan <sup>R</sup> , Erm <sup>R</sup> | (3)                 |
| IU8773                                                            | D39 <i>ftsX</i> (S161Y) P <sub>c</sub> -[ <i>kan-rpsL</i> <sup>+</sup> ] (IU1690 X <i>ftsX</i> (S161Y) P <sub>c</sub> -[ <i>kan-rpsL</i> <sup>+</sup> ] from IU6220)                                                                               | Kan <sup>R</sup>                    | This study          |
| IU9004                                                            | D39 <i>ftsX</i> (N269T) P <sub>c</sub> -[ <i>kan-rpsL</i> <sup>+</sup> ] (IU1690 X <i>ftsX</i> (N269T) P <sub>c</sub> -[ <i>kan-rpsL</i> <sup>+</sup> ] from IU6236)                                                                               | Kan <sup>R</sup>                    | This study          |
| IU9008                                                            | D39 <i>ftsX</i> (W183L) P <sub>c</sub> -[ <i>kan-rpsL</i> <sup>+</sup> ] (IU1690 X <i>ftsX</i> (W183L) P <sub>c</sub> -[ <i>kan-rpsL</i> <sup>+</sup> ] from IU6321)                                                                               | Kan <sup>R</sup>                    | This study          |
| IU9110                                                            | D39 <i>ftsX</i> (D129V) P <sub>c</sub> -[ <i>kan-rpsL</i> <sup>+</sup> ] (IU1690 X <i>ftsX</i> (D129V) P <sub>c</sub> -[ <i>kan-rpsL</i> <sup>+</sup> ] from IU6234)                                                                               | Kan <sup>R</sup>                    | This study          |
| IU9113                                                            | D39 <i>ftsX</i> (E213V) P <sub>c</sub> -[ <i>kan-rpsL</i> <sup>+</sup> ] (IU1690 X <i>ftsX</i> (E213V) P <sub>c</sub> -[ <i>kan-rpsL</i> <sup>+</sup> ] from IU6237)                                                                               | Kan <sup>R</sup>                    | This study          |
| IU9621                                                            | D39 $\Delta$ <i>cps rpsL1</i> $\Delta$ <i>khpA</i> // $\Delta$ <i>bgaA</i> :: <i>kan t1t2</i> P <sub>ftsA</sub> - <i>khpA</i> <sup>+</sup> (IU9036 X fusion $\Delta$ <i>bgaA</i> :: <i>kan t1t2</i> P <sub>ftsA</sub> - <i>khpA</i> <sup>+</sup> ) | Str <sup>R</sup> , Kan <sup>R</sup> | (4)                 |
| IU10748                                                           | D39 <i>ftsX</i> P <sub>c</sub> -[ <i>kan-rpsL</i> <sup>+</sup> ] (IU1690 X <i>ftsX</i> <sup>+</sup> P <sub>c</sub> -[ <i>kan-rpsL</i> <sup>+</sup> ] from IU4325)                                                                                  | Kan <sup>R</sup>                    | This study          |
| IU11720                                                           | D39 $\Delta$ <i>amiACDEF</i> ::P <sub>c</sub> -[ <i>kan-rpsL</i> <sup>+</sup> ] (IU1690 X fusion $\Delta$ <i>amiACDEF</i> ::P <sub>c</sub> -[ <i>kan-rpsL</i> <sup>+</sup> ])                                                                      | Kan <sup>R</sup>                    | This study          |
| IU11759                                                           | D39 $\Delta$ <i>amiACDEF</i> ::P <sub>c</sub> - <i>aad9</i> (IU1690 X fusion $\Delta$ <i>amiACDEF</i> ::P <sub>c</sub> - <i>aad9</i> ) = $\Delta$ <i>amiA-F</i>                                                                                    | Spc <sup>R</sup>                    | This study          |
| IU11778                                                           | D39 $\Delta$ [ <i>spd_1167-spd_1170</i> ]::P <sub>c</sub> - <i>cat</i> (IU1690 X fusion $\Delta$ [ <i>spd_1167-spd_1170</i> ]::P <sub>c</sub> - <i>cat</i> )                                                                                       | Cat <sup>R</sup>                    | This study          |
| IU11819                                                           | TIGR4 $\Delta$ [ <i>cps4A'-cps4E'</i> ]::P <sub>c</sub> - <i>cat</i> (IU1686 X fusion $\Delta$ [ <i>cps4A-cps4E</i> ]::P <sub>c</sub> - <i>cat</i> )                                                                                               | Cat <sup>R</sup>                    | This study          |

| IU11848                                                      | D39 $\Delta$ aliA::P <sub>c</sub> -[kan-rpsL <sup>+</sup> ] (IU1690 X $\Delta$ aliA::P <sub>c</sub> -[kan-rpsL <sup>+</sup> ] from K218)                                                                                                                            | Kan <sup>R</sup>                                                          | This study          |
|--------------------------------------------------------------|---------------------------------------------------------------------------------------------------------------------------------------------------------------------------------------------------------------------------------------------------------------------|---------------------------------------------------------------------------|---------------------|
| IU11850                                                      | D39 $\Delta$ aliB::P <sub>c</sub> -erm (IU1690 X $\Delta$ aliB::P <sub>c</sub> -erm from E241)                                                                                                                                                                      | Erm <sup>R</sup>                                                          | This study          |
| IU11867                                                      | D39 $\Delta$ amiACDEF::P <sub>c</sub> -aad9 $\Delta$ [spd_1167-spd_1170]::P <sub>c</sub> -cat (IU11759 X $\Delta$ [spd_1167-spd_1170]::P <sub>c</sub> -cat from IU11778)                                                                                            | Spc <sup>R</sup> , Cat <sup>R</sup>                                       | This study          |
| IU11892                                                      | D39 $\Delta$ amiACDEF::P <sub>c</sub> -aad9 $\Delta$ [spd_1167-spd_1170]::P <sub>c</sub> -cat $\Delta$ aliA::P <sub>c</sub> -[kan-rpsL <sup>+</sup> ] (IU11867 X $\Delta$ aliA::P <sub>c</sub> -[kan-rpsL <sup>+</sup> ] from IU11848)                              | Spc <sup>R</sup> , Cat <sup>R</sup> , Kan <sup>R</sup>                    | This study          |
| IU11919                                                      | D39 $\Delta$ amiACDEF::P <sub>c</sub> -aad9 $\Delta$ [spd_1167-spd_1170]::P <sub>c</sub> -cat $\Delta$ aliA::P <sub>c</sub> -[kan-rpsL <sup>+</sup> ] $\Delta$ aliB::P <sub>c</sub> -erm (IU11892 X $\Delta$ aliB::P <sub>c</sub> -erm from IU11850) = $\Delta$ OPT | Spc <sup>R</sup> , Cat <sup>R</sup> , Kan <sup>R</sup> , Erm <sup>R</sup> | This study          |
| IU11966                                                      | TIGR4 P1542                                                                                                                                                                                                                                                         | None                                                                      | (5, 6)              |
| IU12001                                                      | TIGR4 $\Delta$ [cps4A'-cps4E']::P <sub>c</sub> -cat = TIGR4 $\Delta$ cps (IU11966 X $\Delta$ [cps4A'-cps4E']::P <sub>c</sub> -cat from IU11819)                                                                                                                     | Cat <sup>R</sup>                                                          | This study          |
| IU12163                                                      | D39 $\Delta$ cls::P <sub>c</sub> -erm (IU1690 X $\Delta$ cls::P <sub>c</sub> -erm from E422)                                                                                                                                                                        | Erm <sup>R</sup>                                                          | This study          |
| IU12470                                                      | D39 $\Delta$ dltA::P <sub>c</sub> -erm (IU1690 X fusion $\Delta$ dltA::P <sub>c</sub> -erm)                                                                                                                                                                         | Erm <sup>R</sup>                                                          | This study          |
| IU13765                                                      | D39 rpsL1 $\Delta$ amiACDEF::P <sub>c</sub> -[kan-rpsL <sup>+</sup> ] (IU1781 X $\Delta$ amiACDEF::P <sub>c</sub> -[kan-rpsL <sup>+</sup> ] from IU11720)                                                                                                           | Kan <sup>R</sup>                                                          | This study          |
| IU13780                                                      | D39 rpsL1 $\Delta$ amiACDEF (IU13765 X fusion $\Delta$ amiACDEF)                                                                                                                                                                                                    | Str <sup>R</sup>                                                          | This study          |
| IU14488                                                      | D39 $\Delta$ amiD (IU1690 X $\Delta$ amiD from E120)                                                                                                                                                                                                                | Erm <sup>R</sup>                                                          | This study          |
| IU14510                                                      | D39 $\Delta$ amiD // $\Delta$ bgaA::kan t1t2 P <sub>ftsA</sub> -amiD <sup>+</sup> (IU14488 X fusion $\Delta$ bgaA::kan t1t2 P <sub>ftsA</sub> -amiD <sup>+</sup> )                                                                                                  | Kan <sup>R</sup>                                                          | This study          |
| E120                                                         | D39 $\Delta$ cps $\Delta$ amiD::P <sub>c</sub> -erm (IU1945 X fusion $\Delta$ amiD::P <sub>c</sub> -erm)                                                                                                                                                            | Erm <sup>R</sup>                                                          | This study          |
| E241                                                         | D39 $\Delta$ cps $\Delta$ aliB::P <sub>c</sub> -erm (IU1945 X fusion $\Delta$ aliB::P <sub>c</sub> -erm)                                                                                                                                                            | Erm <sup>R</sup>                                                          | This study          |
| E422                                                         | D39 $\Delta$ cps $\Delta$ cls::P <sub>c</sub> -erm (IU1945 X fusion $\Delta$ cls::P <sub>c</sub> -erm)                                                                                                                                                              | Erm <sup>R</sup>                                                          | This study          |
| K218                                                         | D39 $\Delta$ cps $\Delta$ aliA::P <sub>c</sub> -[kan-rpsL <sup>+</sup> ] (IU1945 X fusion $\Delta$ aliA::P <sub>c</sub> -[kan-rpsL <sup>+</sup> ])                                                                                                                  | Kan <sup>R</sup>                                                          | This study          |
| <b>Other <i>Streptococcus</i> strains used in this study</b> |                                                                                                                                                                                                                                                                     |                                                                           |                     |
| Strain number                                                | Genotype (description)                                                                                                                                                                                                                                              | Antibiotic resistance <sup>a</sup>                                        | Reference or source |
| IU11303                                                      | <i>S. mitis</i> ATCC 49456; NCTC 12261 [NS 51]                                                                                                                                                                                                                      | None                                                                      | ATCC                |
| IU11305                                                      | <i>S. sanguinis</i> ATCC 10556; DSS-10                                                                                                                                                                                                                              | None                                                                      | ATCC                |

| IU11309                                                                                            | <i>S. mutans</i> ATCC 25175; NCTC 10449 [IFO 13955]                                    | None                                | ATCC                                                                                                                                                                                                                           |
|----------------------------------------------------------------------------------------------------|----------------------------------------------------------------------------------------|-------------------------------------|--------------------------------------------------------------------------------------------------------------------------------------------------------------------------------------------------------------------------------|
| <b><i>Bacillus subtilis</i> strains used in this study</b>                                         |                                                                                        |                                     |                                                                                                                                                                                                                                |
| Strain number                                                                                      | Genotype (description)                                                                 | Antibiotic resistance <sup>a</sup>  | Reference or source                                                                                                                                                                                                            |
| IU12153                                                                                            | DK453, ancestral NCIB3610 $\Delta$ <i>spoIII</i> E:: <i>kan</i>                        | Kan <sup>R</sup>                    | (7)                                                                                                                                                                                                                            |
| IU12165                                                                                            | NCIB3610 $\Delta$ <i>spoIII</i> E:: <i>kan</i> $\Delta$ <i>ftsX</i> ::Tn10 <i>spec</i> | Kan <sup>R</sup> , Spc <sup>R</sup> | Gift of D. Kearns                                                                                                                                                                                                              |
| IU12166                                                                                            | NCIB3610 $\Delta$ <i>spoIII</i> E:: <i>kan</i> $\Delta$ <i>ftsE</i> ::Tn10 <i>spec</i> | Kan <sup>R</sup> , Spc <sup>R</sup> |                                                                                                                                                                                                                                |
| IU12981                                                                                            | NCIB3610 $\Delta$ <i>spoIII</i> E:: <i>kan</i> $\Delta$ <i>ftsX</i>                    | Kan <sup>R</sup>                    |                                                                                                                                                                                                                                |
| <b>Primers used to construct strains</b>                                                           |                                                                                        |                                     |                                                                                                                                                                                                                                |
| Primer                                                                                             | Sequence (5' to 3')                                                                    | Template <sup>b</sup>               | Amplicon Product                                                                                                                                                                                                               |
| <b>For construction of IU6220, IU6234, IU6236, IU6237 using error-prone PCR</b>                    |                                                                                        |                                     |                                                                                                                                                                                                                                |
| CS235                                                                                              | CACCTCTGTTATTTTCAATACAGCGAAACT<br>AGCTAC                                               | IU4325                              | <i>ftsEX</i> <sup>+</sup> P <sub>c</sub> -<br>[ <i>kan-rpsL</i> <sup>+</sup> ]<br>error-prone<br>amplicon;<br><i>ftsEX</i> <sup>+</sup> to<br>979 bp<br>downstream<br>of P <sub>c</sub> -[ <i>kan-<br/>rpsL</i> <sup>+</sup> ] |
| CS129                                                                                              | GGTGAAGACCAAATGGCAAGAGCAAACG                                                           |                                     |                                                                                                                                                                                                                                |
| <b>For construction of IU8773 (<i>ftsX</i>(S161Y) P<sub>c</sub>-[<i>kan-rpsL</i><sup>+</sup>])</b> |                                                                                        |                                     |                                                                                                                                                                                                                                |
| CS128                                                                                              | TAAATACCTTGCGCCACCGTGTCATTGC                                                           | IU6220                              | 3' <i>ftsE</i> +<br><i>ftsX</i> (S161Y)<br>P <sub>c</sub> -[ <i>kan-<br/>rpsL</i> <sup>+</sup> ]                                                                                                                               |
| CS129                                                                                              | GGTGAAGACCAAATGGCAAGAGCAAACG                                                           |                                     |                                                                                                                                                                                                                                |
| <b>For construction of IU9004 (<i>ftsX</i>(N269T) P<sub>c</sub>-[<i>kan-rpsL</i><sup>+</sup>])</b> |                                                                                        |                                     |                                                                                                                                                                                                                                |
| CS128                                                                                              | TAAATACCTTGCGCCACCGTGTCATTGC                                                           | IU6236                              | 3' <i>ftsE</i> +<br><i>ftsX</i><br>(N269T) P <sub>c</sub> -<br>[ <i>kan-rpsL</i> <sup>+</sup> ]                                                                                                                                |
| CS129                                                                                              | GGTGAAGACCAAATGGCAAGAGCAAACG                                                           |                                     |                                                                                                                                                                                                                                |
| <b>For construction of IU9008 (<i>ftsX</i>(W183L) P<sub>c</sub>-[<i>kan-rpsL</i><sup>+</sup>])</b> |                                                                                        |                                     |                                                                                                                                                                                                                                |
| CS128                                                                                              | TAAATACCTTGCGCCACCGTGTCATTGC                                                           | IU6321                              | 3' <i>ftsE</i> +<br><i>ftsX</i><br>(W183L) P <sub>c</sub> -<br>[ <i>kan-rpsL</i> <sup>+</sup> ]                                                                                                                                |
| CS129                                                                                              | GGTGAAGACCAAATGGCAAGAGCAAACG                                                           |                                     |                                                                                                                                                                                                                                |
| <b>For construction of IU9110 (<i>ftsX</i>(D129V) P<sub>c</sub>-[<i>kan-rpsL</i><sup>+</sup>])</b> |                                                                                        |                                     |                                                                                                                                                                                                                                |
| CS128                                                                                              | TAAATACCTTGCGCCACCGTGTCATTGC                                                           | IU6234                              | 3' <i>ftsE</i> +<br><i>ftsX</i><br>(D129V) P <sub>c</sub> -<br>[ <i>kan-rpsL</i> <sup>+</sup> ]                                                                                                                                |
| CS129                                                                                              | GGTGAAGACCAAATGGCAAGAGCAAACG                                                           |                                     |                                                                                                                                                                                                                                |
| <b>For construction of IU9113 (<i>ftsX</i>(E213V) P<sub>c</sub>-[<i>kan-rpsL</i><sup>+</sup>])</b> |                                                                                        |                                     |                                                                                                                                                                                                                                |
| CS128                                                                                              | TAAATACCTTGCGCCACCGTGTCATTGC                                                           | IU6237                              | 3' <i>ftsE</i> +                                                                                                                                                                                                               |

|                                                                                                                      |                                                                      |                                                                           |                                                                                                   |
|----------------------------------------------------------------------------------------------------------------------|----------------------------------------------------------------------|---------------------------------------------------------------------------|---------------------------------------------------------------------------------------------------|
| CS129                                                                                                                | GGTGAAGACCAAATGGCAAGAGCAAACG                                         |                                                                           | <i>ftsX</i> (E213V)<br>P <sub>c</sub> -[ <i>kan-rpsL</i> <sup>+</sup> ]                           |
| <b>For construction of IU10748 (<i>ftsX</i><sup>+</sup> P<sub>c</sub>-[<i>kan-rpsL</i><sup>+</sup>])</b>             |                                                                      |                                                                           |                                                                                                   |
| CS128                                                                                                                | TAAATACCTTGCGCCACCGTGTCATTGC                                         | IU4325                                                                    | 3' <i>ftsE</i> +<br><i>ftsX</i> <sup>+</sup> P <sub>c</sub> -<br>[ <i>kan-rpsL</i> <sup>+</sup> ] |
| CS129                                                                                                                | GGTGAAGACCAAATGGCAAGAGCAAACG                                         |                                                                           |                                                                                                   |
| <b>For construction of IU11720 (<math>\Delta</math><i>amiACDEF</i>::P<sub>c</sub>-[<i>kan-rpsL</i><sup>+</sup>])</b> |                                                                      |                                                                           |                                                                                                   |
| P25                                                                                                                  | TGCTCCTGTTCGCTTGATGATGGA                                             | D39                                                                       | 5' upstream<br>of <i>amiA</i> +<br>60 bp of 5'<br><i>amiA</i>                                     |
| P29                                                                                                                  | CATTATCCATTA AAAAATCAAACGGATCCTAA<br>AGTACACCTGCTGCTAATAAAAACAAGACC  |                                                                           |                                                                                                   |
| kanrpsL<br>forward                                                                                                   | TAGGATCCGTTTGATTTTTAATGGATAATG                                       | P <sub>c</sub> -[ <i>kan-rpsL</i> <sup>+</sup> ]<br>cassette <sup>c</sup> | P <sub>c</sub> -[ <i>kan-rpsL</i> <sup>+</sup> ]                                                  |
| kanrpsL<br>reverse                                                                                                   | GGGCCCTTTTCCTTATGCTTTTG                                              |                                                                           |                                                                                                   |
| KB411                                                                                                                | CAAAGCATAAGGAAAGGGGCCCGGTCAC<br>TATGTTTGGGCGAACCAAGCCGAA             | D39                                                                       | 57 bp of 3'<br><i>amiF</i> + 3'<br>downstream<br>of <i>amiF</i>                                   |
| KB412                                                                                                                | CTTCGCTACGATAGAGTTGTCCGATGTCCG                                       |                                                                           |                                                                                                   |
| <b>For construction of IU11759 (<math>\Delta</math><i>amiACDEF</i>::P<sub>c</sub>-<i>aad9</i>)</b>                   |                                                                      |                                                                           |                                                                                                   |
| P25                                                                                                                  | TGCTCCTGTTCGCTTGATGATGGA                                             | D39                                                                       | 5' upstream<br>of <i>amiA</i> +<br>60 bp of 5'<br><i>amiA</i>                                     |
| P29                                                                                                                  | CATTATCCATTA AAAAATCAAACGGATCCTAA<br>AGTACACCTGCTGCTAATAAAAACAAGACC  |                                                                           |                                                                                                   |
| kanrpsL<br>forward                                                                                                   | TAGGATCCGTTTGATTTTTAATGGATAATG                                       | P <sub>c</sub> - <i>aad9</i><br>cassette<br>from<br>IU8429 <sup>d</sup>   | P <sub>c</sub> - <i>aad9</i>                                                                      |
| kanrpsL<br>reverse                                                                                                   | GGGCCCTTTTCCTTATGCTTTTG                                              |                                                                           |                                                                                                   |
| KB411                                                                                                                | CAAAGCATAAGGAAAGGGGCCCGGTCAC<br>TATGTTTGGGCGAACCAAGCCGAA             | D39                                                                       | 57 bp of 3'<br><i>amiF</i> + 3'<br>downstream<br>of <i>amiF</i>                                   |
| KB412                                                                                                                | CTTCGCTACGATAGAGTTGTCCGATGTCCG                                       |                                                                           |                                                                                                   |
| <b>For construction of IU11778 (<math>\Delta</math>[<i>spd_1167</i>-<i>spd_1170</i>]::P<sub>c</sub>-<i>cat</i>)</b>  |                                                                      |                                                                           |                                                                                                   |
| P1043                                                                                                                | CCAGGATTAGCTGGGATGATTTGTAGACG<br>G                                   | D39                                                                       | 5' upstream<br>of<br><i>spd_1170</i> +<br>75 bp of 5'<br><i>spd_1170</i>                          |
| P1045                                                                                                                | CATTATCCATTA AAAAATCAAACGGATCCTAA<br>CTACAAGCAACCAATCCTACTACAGCTAT   |                                                                           |                                                                                                   |
| kanrpsL<br>forward                                                                                                   | TAGGATCCGTTTGATTTTTAATGGATAATG                                       | P <sub>c</sub> - <i>cat</i><br>cassette <sup>e</sup>                      | P <sub>c</sub> - <i>cat</i>                                                                       |
| kanrpsL<br>reverse                                                                                                   | GGGCCCTTTTCCTTATGCTTTTG                                              |                                                                           |                                                                                                   |
| KB413                                                                                                                | AAACGTCCAAAAGCATAAGGAAAGGGGCC<br>CGTTGAATTTAAAGCACAGTACCATGAATT<br>T | D39                                                                       | 102 bp of 3'<br><i>spd_1167</i> +<br>3'                                                           |

|                                                                                                                                                                                                                                                                                                              |                                                                      |                                           |                                                                         |
|--------------------------------------------------------------------------------------------------------------------------------------------------------------------------------------------------------------------------------------------------------------------------------------------------------------|----------------------------------------------------------------------|-------------------------------------------|-------------------------------------------------------------------------|
| KB414                                                                                                                                                                                                                                                                                                        | ATCAGCACTCGTAGATACACACGGCAAGC                                        |                                           | downstream of <i>spd_1167</i>                                           |
| <b>For construction of IU11819 (TIGR4 <math>\Delta</math>[<i>cps4A'</i>-<i>cps4E'</i>]::P<sub>c</sub>-cat)</b>                                                                                                                                                                                               |                                                                      |                                           |                                                                         |
| KB419                                                                                                                                                                                                                                                                                                        | CATTATCCATTAATAAATCAAACGGATCCTA<br>CGACACCGAACTAATAGGACCATAGGTG      | TIGR4 (IU1686)                            | 5' upstream of <i>cps4A</i> + 5' 51 bp of <i>cps4A</i>                  |
| KB420                                                                                                                                                                                                                                                                                                        | CACGTTACAGAAAGTGAAGCGAAGTG                                           |                                           |                                                                         |
| kanrpsL forward                                                                                                                                                                                                                                                                                              | TAGGATCCGTTTGATTTTTAATGGATAATG                                       | P <sub>c</sub> -cat cassette <sup>e</sup> | P <sub>c</sub> -cat                                                     |
| kanrpsL reverse                                                                                                                                                                                                                                                                                              | GGGCCCTTTCTTATGCTTTTG                                                |                                           |                                                                         |
| KB416                                                                                                                                                                                                                                                                                                        | CCTCCAAAGAACGTCTTCCATAGAAGG                                          | TIGR4 (IU1686)                            | 42 bp of 3' <i>cps4E</i> + 3' downstream of <i>cps4E</i>                |
| KB418                                                                                                                                                                                                                                                                                                        | AAACGTCCAAAAGCATAAGGAAAGGGGCC<br>CAAACGAAAAGGTATTGTAGAGGGTAGTG<br>GT |                                           |                                                                         |
| <b>For construction of IU11848 (D39 <math>\Delta</math><i>aliA</i>::P<sub>c</sub>-[<i>kan-rpsL</i><sup>+</sup>])</b>                                                                                                                                                                                         |                                                                      |                                           |                                                                         |
| P527                                                                                                                                                                                                                                                                                                         | AGTCCAAAGTTTAGGAGCAAGGCGACGCT<br>A                                   | K218                                      | $\Delta$ <i>aliA</i> ::P <sub>c</sub> -[ <i>kan-rpsL</i> <sup>+</sup> ] |
| P528                                                                                                                                                                                                                                                                                                         | TTTCCATTGGCATCAACGGTCAAGCCCTTC                                       |                                           |                                                                         |
| <b>For construction of IU11850 (D39 <math>\Delta</math><i>aliB</i>::P<sub>c</sub>-erm)</b>                                                                                                                                                                                                                   |                                                                      |                                           |                                                                         |
| P555                                                                                                                                                                                                                                                                                                         | TTCTTGCTACCAGCAACGGTTGGAGTGGTT                                       | E241                                      | $\Delta$ <i>aliB</i> ::P <sub>c</sub> -erm                              |
| P556                                                                                                                                                                                                                                                                                                         | GCCGCAAAGATAAATAAGAGAGCAAACGA<br>GGTCT                               |                                           |                                                                         |
| <b>For construction of IU11867 (D39 <math>\Delta</math><i>amiACDEF</i>::P<sub>c</sub>-<i>aad9</i> <math>\Delta</math>[<i>spd_1167</i>-<i>spd_1170</i>]::P<sub>c</sub>-cat)</b>                                                                                                                               |                                                                      |                                           |                                                                         |
| P1043                                                                                                                                                                                                                                                                                                        | CCAGGATTAGCTGGGATGATTTGTAGACG<br>G                                   | IU11778                                   | $\Delta$ [ <i>spd_1167</i> - <i>spd_1171</i> ]::P <sub>c</sub> -cat     |
| KB414                                                                                                                                                                                                                                                                                                        | ATCAGCACTCGTAGATACACACGGCAAGC                                        |                                           |                                                                         |
| <b>For construction of IU11892 (D39 <math>\Delta</math><i>amiACDEF</i>::P<sub>c</sub>-<i>aad9</i> <math>\Delta</math>[<i>spd_1167</i>-<i>spd_1170</i>]::P<sub>c</sub>-cat <math>\Delta</math><i>aliA</i>::P<sub>c</sub>-[<i>kan-rpsL</i><sup>+</sup>])</b>                                                   |                                                                      |                                           |                                                                         |
| P527                                                                                                                                                                                                                                                                                                         | AGTCCAAAGTTTAGGAGCAAGGCGACGCT<br>A                                   | IU11848                                   | $\Delta$ <i>aliA</i> ::P <sub>c</sub> -[ <i>kan-rpsL</i> <sup>+</sup> ] |
| P528                                                                                                                                                                                                                                                                                                         | TTTCCATTGGCATCAACGGTCAAGCCCTTC                                       |                                           |                                                                         |
| <b>For construction of IU11919 (D39 <math>\Delta</math><i>amiACDEF</i>::P<sub>c</sub>-<i>aad9</i> <math>\Delta</math>[<i>spd_1167</i>-<i>spd_1170</i>]::P<sub>c</sub>-cat <math>\Delta</math><i>aliA</i>::P<sub>c</sub>-[<i>kan-rpsL</i><sup>+</sup>] <math>\Delta</math><i>aliB</i>::P<sub>c</sub>-erm)</b> |                                                                      |                                           |                                                                         |
| P555                                                                                                                                                                                                                                                                                                         | TTCTTGCTACCAGCAACGGTTGGAGTGGTT                                       | IU11850                                   | $\Delta$ <i>aliB</i> ::P <sub>c</sub> -erm                              |
| P556                                                                                                                                                                                                                                                                                                         | GCCGCAAAGATAAATAAGAGAGCAAACGA<br>GGTCT                               |                                           |                                                                         |
| <b>For construction of IU12001 (TIGR4 <math>\Delta</math>[<i>cps4A'</i>-<i>cps4E'</i>]::P<sub>c</sub>-cat)</b>                                                                                                                                                                                               |                                                                      |                                           |                                                                         |
| KB420                                                                                                                                                                                                                                                                                                        | CACGTTACAGAAAGTGAAGCGAAGTG                                           | IU11819                                   | $\Delta$ [ <i>cps4A'</i> - <i>cps4E'</i> ]::P <sub>c</sub> -cat         |
| KB416                                                                                                                                                                                                                                                                                                        | CCTCCAAAGAACGTCTTCCATAGAAGG                                          |                                           |                                                                         |
| <b>For construction of IU12163 (D39 <math>\Delta</math><i>cls</i>::P<sub>c</sub>-erm)</b>                                                                                                                                                                                                                    |                                                                      |                                           |                                                                         |
| P943                                                                                                                                                                                                                                                                                                         | TCCCTGCCTTGACTCGCTTGTTGAGTTTA                                        | E422                                      | $\Delta$ <i>cls</i> ::P <sub>c</sub> -                                  |

|                                                                                                      |                                                                     |                                                   |                                                                                               |
|------------------------------------------------------------------------------------------------------|---------------------------------------------------------------------|---------------------------------------------------|-----------------------------------------------------------------------------------------------|
| P944                                                                                                 | ATGTCCAGCTTGGTCTCCTTGCTCTGTCAA                                      |                                                   | <i>erm</i>                                                                                    |
| <b>For construction of IU12470 (D39 <math>\Delta dltA::P_c-erm</math>)</b>                           |                                                                     |                                                   |                                                                                               |
| P1659                                                                                                | CAAAGGTTGGAAGTTAGTTGCTAGAAATCC                                      | D39                                               | 5' upstream of <i>dltA</i> + 5' 84 bp of <i>dltA</i>                                          |
| P1661                                                                                                | CATTATCCATTA AAAATCAAACGGATCCTAA<br>ACATTATAGACAGGATAGCTAGGCTGTGT   |                                                   |                                                                                               |
| kanrpsL forward                                                                                      | TAGGATCCGTTTGATTTTTAATGGATAATG                                      | P <sub>c</sub> - <i>erm</i> cassette <sup>c</sup> | P <sub>c</sub> - <i>erm</i>                                                                   |
| kanrpsL reverse                                                                                      | GGGCCCTTTCCTTATGCTTTTG                                              |                                                   |                                                                                               |
| P1662                                                                                                | AAACGTCCAAAAGCATAAGGAAAGGGGCC<br>CACTCAAATGGAAAGATTGACATCAAAGG<br>A | D39                                               | 3' 54 bp of <i>dltA</i> + 3' downstream of <i>dltA</i>                                        |
| P1660                                                                                                | CGATATAGTACCAGGTCACACCATGCC                                         |                                                   |                                                                                               |
| <b>For construction of IU13765 (D39 <i>rpsL1</i> <math>\Delta amiACDEF::P_c-[kan-rpsL^+]</math>)</b> |                                                                     |                                                   |                                                                                               |
| P25                                                                                                  | TGCTCCTGTTTCGCTTGATGATGGA                                           | IU11720                                           | $\Delta amiA-F::P_c-[kan-rpsL^+]$                                                             |
| KB412                                                                                                | CTTCGCTACGATAGAGTTGTCCGATGTCCG                                      |                                                   |                                                                                               |
| <b>For construction of IU13780 (D39 <i>rpsL1</i> <math>\Delta amiACDEF</math>)</b>                   |                                                                     |                                                   |                                                                                               |
| P25                                                                                                  | TGCTCCTGTTTCGCTTGATGATGGA                                           | D39                                               | 5' upstream of <i>amiA</i> + 5' 60 bp of <i>amiA</i>                                          |
| KB430                                                                                                | GGTTCGCCCAAACATAGTGACCAAGTACA<br>CCTGCTGCTAATAAAACAAGACCTGC         |                                                   |                                                                                               |
| KB429                                                                                                | CTACAGCAGGTCTTGTTTTATTAGCAGCAG<br>GTGTA CTGGTCACTATGTTTGGGCGAACC    | D39                                               | 3' 57 bp of <i>amiF</i> + 3' downstream of <i>amiF</i>                                        |
| KB412                                                                                                | CTTCGCTACGATAGAGTTGTCCGATGTCCG                                      |                                                   |                                                                                               |
| <b>For construction of IU14510 (D39 <math>\Delta amiD // bgaA::kan-T1T2-P_{ftsA}-amiD^+</math>)</b>  |                                                                     |                                                   |                                                                                               |
| P146                                                                                                 | TGGCCATTCATCGCTGGTCGTGCTGAAAT                                       | IU9621                                            | 3' PTS EII + P <sub>c</sub> - <i>kan</i> + t1t2 + P <sub>ftsA</sub> + 5' 13 bp of <i>amiD</i> |
| KB448                                                                                                | CGATTGTAGACATTACATCGCTTCCTCTCT<br>ATCTTCCAAGTTTCG                   |                                                   |                                                                                               |
| KB447                                                                                                | ATAGAGAGGAAGCGATGTAATGTCTACAAT<br>CGATAAAGAAAAATTCAGTTTGTAAAACG     | D39                                               | 3' 19 bp of P <sub>ftsA</sub> + <i>amiD</i> + 34 bp of 3' <i>bgaA</i>                         |
| KB446                                                                                                | CCGCAGCAACTGGTTTATGAGAAAGTAAGT<br>TCTTCTATCTATGTGTACGTGGATCACTAG    |                                                   |                                                                                               |
| KB445                                                                                                | CTAGTGATCCACGTACACATAGATAGAAGA<br>ACTTACTTTCTCATAAACCAGTTGCTGCGG    | IU9621                                            | 3' 26 bp of <i>amiD</i> + 3' <i>bgaA</i>                                                      |
| CS121                                                                                                | GCTTTCTTGAGGCAATTCATTGGTGC                                          |                                                   |                                                                                               |
| <b>For construction of E120 (D39 <math>\Delta cps \Delta amiD::P_c-erm</math>)</b>                   |                                                                     |                                                   |                                                                                               |
| P380                                                                                                 | CTCAAGAACCTACAAGTCACCTAGTCAGGC                                      | D39                                               | 5' upstream of <i>amiD</i> + 5' 60 bp of <i>amiD</i>                                          |
| P382                                                                                                 | CATTATCCATTA AAAATCAAACGGATCCTAT<br>TCAGAGGCAAATCGTCACGTTTTACAAA    |                                                   |                                                                                               |

|                                                                                                             |                                                                  |                                                                        |                                                        |
|-------------------------------------------------------------------------------------------------------------|------------------------------------------------------------------|------------------------------------------------------------------------|--------------------------------------------------------|
| kanrpsL forward                                                                                             | TAGGATCCGTTTGATTTTTAATGGATAATG                                   | P <sub>c</sub> -erm cassette <sup>c</sup>                              | P <sub>c</sub> -erm                                    |
| kanrpsL reverse                                                                                             | GGGCCCTTTTCCTTATGCTTTTG                                          |                                                                        |                                                        |
| P383                                                                                                        | CAAAGCATAAGGAAAGGGGCCCTCCCTT<br>TTCGTAGTTGGTCAAACCTTAG           | D39                                                                    | 3' 60 bp of <i>amiD</i> + 3' downstream of <i>amiD</i> |
| P381                                                                                                        | CCCTTTCAGGTCAGTATAAAGTGACGGAG<br>G                               |                                                                        |                                                        |
| <b>For construction of E241 (D39 Δ<i>cps</i> Δ<i>aliB</i>::P<sub>c</sub>-erm)</b>                           |                                                                  |                                                                        |                                                        |
| P555                                                                                                        | TTCTTGCTACCAGCAACGGTTGGAGTGGTT                                   | D39                                                                    | 5' upstream of <i>aliB</i> + 5' 60 bp of <i>aliB</i>   |
| P557                                                                                                        | CATTATCCATTA AAAATCAAACGGATCCTAA<br>ACTCCTGTACCCAGGACAAGACCTG    |                                                                        |                                                        |
| kanrpsL forward                                                                                             | TAGGATCCGTTTGATTTTTAATGGATAATG                                   | P <sub>c</sub> -erm cassette <sup>c</sup>                              | P <sub>c</sub> -erm                                    |
| kanrpsL reverse                                                                                             | GGGCCCTTTTCCTTATGCTTTTG                                          |                                                                        |                                                        |
| P558                                                                                                        | CAAAGCATAAGGAAAGGGGCCCAAAGAA<br>AAAGAAGAATCCAATAAAAAAGCCC        | D39                                                                    | 3' 57 bp of <i>aliB</i> + 3' downstream of <i>aliB</i> |
| P556                                                                                                        | GCCGCAAAGATAAATAAGAGAGCAAACGA<br>GGTCT                           |                                                                        |                                                        |
| <b>For construction of E422 (D39 Δ<i>cps</i> Δ<i>cls</i>::P<sub>c</sub>-erm)</b>                            |                                                                  |                                                                        |                                                        |
| P943                                                                                                        | TCCCTGCCTTGACTCGCTTGTTGAGTTTA                                    | D39                                                                    | 5' upstream of <i>cls</i> + 5' 60 bp of <i>cls</i>     |
| P945                                                                                                        | CATTATCCATTA AAAATCAAACGGATCCTA<br>CATAATCGAAAGACTAAAGCCATACTTGG |                                                                        |                                                        |
| kanrpsL forward                                                                                             | TAGGATCCGTTTGATTTTTAATGGATAATG                                   | P <sub>c</sub> -erm cassette <sup>c</sup>                              | P <sub>c</sub> -erm                                    |
| kanrpsL reverse                                                                                             | GGGCCCTTTTCCTTATGCTTTTG                                          |                                                                        |                                                        |
| P946                                                                                                        | CAAAGCATAAGGAAAGGGGCCCTCTCAG<br>GAAGTCTATCCTCATTCTATCA           | D39                                                                    | 3' 87 bp of <i>cls</i> + 3' downstream of <i>cls</i>   |
| P944                                                                                                        | ATGTCCAGCTTGGTCTCCTTGCTCTGTCAA                                   |                                                                        |                                                        |
| <b>For construction of K218 (D39 Δ<i>cps</i> Δ<i>aliA</i>::P<sub>c</sub>-[<i>kan-rpsL</i><sup>+</sup>])</b> |                                                                  |                                                                        |                                                        |
| P527                                                                                                        | AGTCCAAAGTTTAGGAGCAAGGCGACGCT<br>A                               | D39                                                                    | 5' upstream of <i>aliA</i> + 5' 60 bp of <i>aliA</i>   |
| P529                                                                                                        | CATTATCCATTA AAAATCAAACGGATCCTAT<br>AAAGTAGTCGCCGCAATAATGTCAC    |                                                                        |                                                        |
| kanrpsL forward                                                                                             | TAGGATCCGTTTGATTTTTAATGGATAATG                                   | P <sub>c</sub> -[ <i>kan-rpsL</i> <sup>+</sup> ] cassette <sup>c</sup> | P <sub>c</sub> -[ <i>kan-rpsL</i> <sup>+</sup> ]       |
| kanrpsL reverse                                                                                             | GGGCCCTTTTCCTTATGCTTTTG                                          |                                                                        |                                                        |
| P530                                                                                                        | CAAAGCATAAGGAAAGGGGCCCACTGT<br>AGATGAATACCAAAAAGCTCAGGA          | D39                                                                    | 3' 100 bp of <i>aliA</i> + 3'                          |



|      |                                |  |                              |
|------|--------------------------------|--|------------------------------|
| P528 | TTTCCATTGGCATCAACGGTCAAGCCCTTC |  | downstream<br>of <i>aliA</i> |
|------|--------------------------------|--|------------------------------|

50 <sup>a</sup>Antibiotic resistance markers: Erm<sup>R</sup>, erythromycin; Kan<sup>R</sup>, kanamycin; Spec<sup>R</sup>,  
51 spectinomycin; Str<sup>R</sup>, streptomycin; Cat<sup>R</sup>, chloramphenicol.

52 <sup>b</sup>Genomic DNA of indicated *S. pneumoniae* strains was used as templates for PCR  
53 reactions, except for P<sub>c</sub>-[*kan-rpsL*<sup>+</sup>], P<sub>c</sub>-*erm*, P<sub>c</sub>-*cat*, and P<sub>c</sub>-*aad9* cassettes.

54 <sup>c</sup>P<sub>c</sub>-[*kan-rpsL*<sup>+</sup>], and P<sub>c</sub>-*erm* are described in (8, 9).

55 <sup>d</sup>The P<sub>c</sub>-*aad9* cassette was amplified from IU8429 (10).

56 <sup>e</sup>P<sub>c</sub>-*cat* cassette was obtained from IU10294 (9).

57

58 **Table S2.** IC<sub>50</sub> of *S. pneumoniae* D39 cells treated with CXCL10, LL-37, or nisin under  
 59 various conditions<sup>a</sup>

|                  | <b>CXCL10</b>                         |                          | <b>LL-37</b>                          |                          | <b>Nisin</b>                             |                             |
|------------------|---------------------------------------|--------------------------|---------------------------------------|--------------------------|------------------------------------------|-----------------------------|
|                  | IC <sub>50</sub><br>(μM) <sup>b</sup> | 95% CI (μM) <sup>c</sup> | IC <sub>50</sub><br>(μM) <sup>b</sup> | 95% CI (μM) <sup>c</sup> | IC <sub>50</sub><br>(μM)<br><sub>b</sub> | 95% CI<br>(μM) <sup>c</sup> |
| 1. TGS-<br>CFU   | 0.016                                 | 0.015–0.017              | 0.063                                 | 0.057–0.070              | 0.25                                     | 0.19–0.32                   |
| 2. NPB-<br>CFU   | 1.9                                   | 1.5–2.4                  | 0.67                                  | 0.47–0.95                | 0.76                                     | 0.70–0.83                   |
| 3. NPB-<br>Fluor | 1.7                                   | 1.1–2.7                  | 1.6                                   | 1.5–1.7                  | 0.80                                     | 0.71–0.90                   |

60 <sup>a</sup> IC<sub>50</sub> and 95% CI of *Spn* D39 to CXCL10, LL-37, and nisin were determined using a  
 61 CFU survival assay in TGS buffer (10 mM Tris-HCl, pH 7.4 with 5 mM glucose) (TGS-  
 62 CFU), or in NPB buffer (10 mM sodium phosphate, pH 7.4 with 1% (vol/vol) BHI broth)  
 63 (NPB CFU), or with a fluorescence-based antimicrobial assay in NPB (NPB-Fluor) as  
 64 described in Materials and Methods. Inhibition curves from which IC<sub>50</sub> and 95% CI  
 65 values were obtained are shown in Fig. 2.

66 <sup>b</sup> IC<sub>50</sub> values were obtained from pooled data from at least two independent  
 67 experiments and fit to a dose-response curve (log of inhibitor vs. response-variable  
 68 slope) using GraphPad Prism.

69 <sup>c</sup> 95% confidence interval of the IC<sub>50</sub> value.

70

71 **Table S3.** IC<sub>50</sub> of chemokine-treated *Bacillus subtilis* under various conditions

| <i>B. subtilis</i> strains <sup>a</sup>                     | CXCL10                             |                          |                                       |                                    |                          | N-terminal CXCL10                  |                          |
|-------------------------------------------------------------|------------------------------------|--------------------------|---------------------------------------|------------------------------------|--------------------------|------------------------------------|--------------------------|
|                                                             | NPB <sup>b</sup>                   |                          | DMEM + 10% (vol/vol) FBS <sup>c</sup> | TGS <sup>d</sup>                   |                          | TGS <sup>d</sup>                   |                          |
|                                                             | IC <sub>50</sub> (μM) <sup>e</sup> | 95% CI (μM) <sup>f</sup> | IC <sub>50</sub> (μM)                 | IC <sub>50</sub> (μM) <sup>e</sup> | 95% CI (μM) <sup>f</sup> | IC <sub>50</sub> (μM) <sup>e</sup> | 95% CI (μM) <sup>f</sup> |
| 1. <i>ftsX</i> <sup>+</sup> <i>ftsE</i> <sup>+</sup> parent | 0.69                               | 0.67–0.71                | >5.8 <sup>g</sup>                     | 0.51                               | 0.36–0.72                | 0.38                               | 0.33–0.43                |
| 2. Δ <i>ftsX</i>                                            | 0.73                               | 0.60–0.90                | >5.8 <sup>g</sup>                     | 0.42                               | 0.32–0.55                | 0.52                               | 0.40–0.67                |
| 3. Δ <i>ftsE</i>                                            | 0.73                               | 0.56–0.96                | nd <sup>h</sup>                       | nd <sup>h</sup>                    |                          | 0.43                               | 0.27–0.68                |

72 <sup>a</sup> *B. subtilis* strains used were *ftsX*<sup>+</sup> *ftsE*<sup>+</sup> parent (IU12153), Δ*ftsX* (IU12981) for assays  
73 in NPB and DMEM +10% (vol/vol) FBS, Δ*ftsX*::Tn10 *spec* (IU12165) for assays in TGS,  
74 and Δ*ftsE*::Tn10 *spec* (IU12166).

75 <sup>b</sup> IC<sub>50</sub> and 95% CI were determined using a fluorescence-based antimicrobial assay in  
76 NPB as described in Materials and Methods. Inhibition curves from which IC<sub>50</sub> and 95%  
77 CI values were obtained are shown in Fig. 6. A CFU survival assay was performed  
78 under the same conditions and results are shown in Fig. S7A.

79 <sup>c</sup> IC<sub>50</sub> values were estimated from a fluorescence-based antimicrobial assay and a CFU  
80 survival assay in DMEM +10% (vol/vol) FBS as described in Materials and Methods.  
81 Graphs from which IC<sub>50</sub> values were estimated are shown in Fig. S7D and S7E.

82 <sup>d</sup> IC<sub>50</sub> and 95% CI were determined using a CFU survival assay in TGS as described in  
83 Materials and Methods. Inhibition curves from which IC<sub>50</sub> and 95% CI values were  
84 obtained are shown in Fig. S7B and S7C.

85 <sup>e</sup> IC<sub>50</sub> values were obtained from pooled data from at least two independent  
86 experiments and fit to a dose-response curve (log of inhibitor vs. response-variable  
87 slope) using GraphPad Prism.

88 <sup>f</sup> 95% confidence interval of the IC<sub>50</sub> value.

89 <sup>g</sup> Less than 50% inhibition was obtained with both the fluorescence-based antimicrobial  
90 assay and the CFU survival assay at the highest concentration (5.8 μM) of CXCL10  
91 (see Fig. S7D and S7E).

92 <sup>h</sup> nd, not determined.

**Table S4.** IC<sub>50</sub> of N-terminal CXCL10-treated *S. pneumoniae* cells with a CFU survival assay in TGS buffer<sup>a</sup>

| <i>S. pneumoniae</i> strains <sup>b</sup>                                    | N-terminal CXCL10                  |                     |
|------------------------------------------------------------------------------|------------------------------------|---------------------|
|                                                                              | IC <sub>50</sub> (μM) <sup>c</sup> | 95% CI <sup>d</sup> |
| 1. D39                                                                       | 0.14                               | 0.12–0.16           |
| 2. <i>ftsX</i> <sup>+</sup> P <sub>c</sub> -[ <i>kan-rpsL</i> <sup>+</sup> ] | 0.14                               | 0.12–0.16           |
| 3. <i>ftsX</i> (W183L) P <sub>c</sub> -[ <i>kan-rpsL</i> <sup>+</sup> ]      | 0.15                               | 0.12–0.19           |
| 4. <i>ftsX</i> (N269T) P <sub>c</sub> -[ <i>kan-rpsL</i> <sup>+</sup> ]      | 0.13                               | 0.10–0.18           |
| 5. <i>ftsX</i> (S161Y) P <sub>c</sub> -[ <i>kan-rpsL</i> <sup>+</sup> ]      | 0.12                               | 0.11–0.13           |
| 6. <i>ftsX</i> (D129V) P <sub>c</sub> -[ <i>kan-rpsL</i> <sup>+</sup> ]      | 0.17                               | 0.11–0.27           |
| 7. <i>ftsX</i> (E213V) P <sub>c</sub> -[ <i>kan-rpsL</i> <sup>+</sup> ]      | 0.15                               | 0.12–0.19           |

<sup>a</sup> IC<sub>50</sub> and 95% CI were determined using a CFU survival assay in TGS as described in

Materials and Methods.

<sup>b</sup> Strains used are in D39 genetic background and are as follows: D39, IU1690; *ftsX*<sup>+</sup> P<sub>c</sub>-[*kan-rpsL*<sup>+</sup>], IU10748; *ftsX* (W183L) P<sub>c</sub>-[*kan-rpsL*<sup>+</sup>], IU9008; *ftsX* (N269T) P<sub>c</sub>-[*kan-rpsL*<sup>+</sup>], IU9004; *ftsX* (S161Y) P<sub>c</sub>-[*kan-rpsL*<sup>+</sup>], IU8773; *ftsX* (D129V) P<sub>c</sub>-[*kan-rpsL*<sup>+</sup>], IU9110; *ftsX* (E213V) P<sub>c</sub>-[*kan-rpsL*<sup>+</sup>], IU9113. The range of N-terminal CXCL10 concentrations used was 0.014 to 1.85 μM for IU1690 and 0.014 to 0.463 μM for all other strains

<sup>c</sup> IC<sub>50</sub> values were obtained from pooled data from at least two independent experiments and fit to a dose-response curve (log of inhibitor vs. response-variable slope) using GraphPad Prism.

<sup>d</sup> 95% confidence interval of the IC<sub>50</sub> value.

## SUPPLEMENTAL FIGURE LEGENDS

**Fig. S1.** *S. pneumoniae* cells in TGS are sensitive to CXCL10 in the 0.03 to 0.06  $\mu$ M range. A CFU survival assay in TGS (10 mM Tris-HCl 5 mM glucose, pH 7.4) in the presence of CXCL10 was performed as described in Materials and Methods. D39 (IU1690, black) and D39  $\Delta$ *cps* (IU1945, red) are encapsulated and unencapsulated strains of serotype 2 *Spn* respectively, and TIGR4 (IU11966, blue), and TIGR4  $\Delta$ *cps* (IU12001, green) are encapsulated and unencapsulated strains of serotype 4 *Spn*, respectively. n indicates the number of independent experiments, each containing duplicate reactions. Each data point represents the mean  $\pm$  SEM (if not visible, error bars are smaller than the symbol). Dose-response curves were fit to pooled data in GraphPad Prism, using the (log of inhibitor vs. response-variable slope) function. See Table 1 for 95% CI values.

**Fig. S2.** Unencapsulated *S. pneumoniae* D39 show significant decreases in CFUs and low fluorescence after incubation in NPB. (A) Percentage CFU survival after 2 h of incubation in TGS (10 mM Tris-HCl with 5 mM glucose, pH 7.4; left two columns) or NPB (10 mM sodium phosphate, pH 7.4 with 1% (vol/vol) BHI broth; right four columns). Strains from left to right are D39 *cps*<sup>+</sup> (IU1690), D39  $\Delta$ *cps* (IU1945), D39 *cps*<sup>+</sup> (IU1690), D39  $\Delta$ *cps* (IU1945), D39 *rpsL1 cps*<sup>+</sup> (IU1781) and D39 *rpsL1 cps2E* ( $\Delta$ A) (IU3309) containing a frameshift mutation within *cps2E*. Strains were grown in BHI broth and resuspended in the indicated buffers as described in Materials and Methods. Cells were serially diluted and plated for CFU both before and after incubation, and % survival ( $\text{CFU}_{2\text{h}}/\text{CFU}_{0\text{h}}$ )  $\pm$  standard error (SE) for each strain is shown. n=2, except for the following: D39 in TGS, n=5; D39  $\Delta$ *cps* in TGS, n=11; D39 in NPB, n=7. Statistical

130 significance was determined using Mann-Whitney T-test. ns, not significant; \*,  $p < 0.05$ ;  
131 \*\*,  $p < 0.01$ . (B) Representative plots of fluorescence over time for incubations of strains  
132 in NPB. Resazurin dye was added after 2 h to cell suspensions in NPB and  
133 fluorescence was measured until approximately 5 h. Numbers to the right of each plot  
134 show the raw fluorescence value in Arbitrary Fluorescence Units (AFU), as well as the  
135 percent relative to *Spn* D39.

136 **Fig. S3.** The fluorescence-based antimicrobial assay for  $IC_{50}$  determination is not  
137 dependent on the basal level of fluorescence signal generated by untreated bacteria.  
138 (A) Representative plots of fluorescence over time for incubations of *Spn* D39 (IU1690,  
139 black), TIGR4 (IU11966, red) and TIGR4  $\Delta cps$  (IU12001, blue) in NPB showing  
140 variability in fluorescence signals among strains. (B) Representative plots showing  
141 similar fluorescence signals between D39 (IU1690, black) and  $\Delta amiA-F$  (IU11759, red)  
142 in NPB. (C) Mean ( $\pm$  SEM) fluorescence (AFU at approximately 4.5 h) in NPB for *Spn*  
143 strains and serotypes and other *Streptococcus* species (y-axis) plotted as a function of  
144 the mean  $IC_{50}$  for CXCL10 (x-axis; closed symbols). Open symbols indicate estimated  
145  $IC_{50}$  values. Upper and lower panels show data from different batches of CXCL10.  
146 Linear regression analysis showed no correlation (upper panel,  $R^2=0.14$ ; lower panel  
147  $R^2=0.06$ ).

148 **Fig. S4.** The  $\Delta amiA-F$  clean deletion mutant phenocopies the  $\Delta amiA-F::P_c-aad9$   
149 strain, and the  $\Delta amiA-F$  mutation is responsible for the phenotype seen in the  $\Delta OPT$   
150 mutant. CXCL10 killing of the  $\Delta amiA-F$  strain is consistent with both fluorescence-based  
151 and CFU survival assays. (A) D39 *rpsL1* (IU1781, black) and isogenic  $\Delta amiA-F$  clean  
152 deletion strain (IU13780, red) were assayed with a fluorescence-based antimicrobial

153 assay in NPB with various concentrations of CXCL10, LL-37 and nisin. (B) D39  
154 (IU1690, black),  $\Delta amiA-F$  (IU11759, red),  $\Delta[spd\_1166-spd\_1170]$  (IU11778, green),  
155  $\Delta aliA$  (IU11848, purple),  $\Delta aliB$  (IU11850, light blue) and  $\Delta OPT$  (IU11919, dark blue)  
156 were assayed with a fluorescence-based antimicrobial assay in NPB with 6  $\mu M$   
157 CXCL10, 1.2  $\mu M$  LL-37 and 2.4  $\mu M$  nisin. (C) *Spn* D39 (IU1690, black) and  $\Delta amiA-F$   
158 (IU11759, red) were assayed with a fluorescence-based antimicrobial assay (Fluor.)  
159 and a CFU survival assay (CFU) in NPB (see Materials and Methods) with 6  $\mu M$   
160 CXCL10. Experiments in A, B, and C were performed once with duplicate wells.

161 **Fig. S5.** *Spn* D39  $\Delta amiA-F$  mutants in NPB are more resistant to nisin, whereas *Spn*  
162 D39  $\Delta dlt$  and *Spn* TIGR4 are more sensitive to LL-37 and nisin relative to *Spn* D39.  
163 Sensitivity to LL-37 (A and B) and nisin (C and D) in NPB was determined using a  
164 fluorescence-based antimicrobial assay, as described in Materials and Methods. (A and  
165 C): *S. pneumoniae* D39 (IU1690, black circles; data from Fig. 2), *Spn* D39  $\Delta amiA-F$   
166 (IU11759, red squares), *Spn* D39  $\Delta OPT$  (IU11919, blue triangles), and *Spn* D39  $\Delta dltA$   
167 (IU12470, green inverted triangles). (B and D): D39 (IU1690, black circles; data from  
168 Fig. 2), *Spn* TIGR4 (IU11966, red squares), and *Spn* TIGR4  $\Delta cps$  (IU12001, blue  
169 triangles). n indicates the number of independent experiments, each containing  
170 duplicate reactions. Each data point represents the mean  $\pm$  SEM (if not visible, error  
171 bars are smaller than the symbol). Dose-response curves were fit to pooled data in  
172 GraphPad Prism, using the (log of inhibitor vs. response-variable slope) function. See  
173 Table 3 for 95% CI values.

174 **Fig. S6.** Sensitivity to CXCL10 and dose response curves of *S. mitis*, *S. sanguinis*,  
175 and *S. mutans* to LL-37. Sensitivities of *S. mitis* (IU11303, red), *S. sanguinis* (IU11305,



176 blue), and *S. mutans* (IU11309, green) to (A) CXCL10 and (B) LL-37 in NPB buffer  
177 relative to *Spn* D39 (IU1690, black closed circles; data from Fig. 2B) and *Spn* TIGR4  
178 (IU11966, black open circles; data from Fig. S5B) were determined using a  
179 fluorescence-based antimicrobial assay, as described in Materials and Methods. Each  
180 bar or point represents the mean  $\pm$  SEM of n independent experiments, each containing  
181 duplicate reactions. Dose-response curves and IC<sub>50</sub> values in (B) were fit to a dose-  
182 response curve (log of inhibitor vs. response-variable slope) using GraphPad Prism.  
183 IC<sub>50</sub> of *S. mutans* to LL-37 was estimated to be 5  $\mu$ M.

184 **Fig. S7.**  $\Delta$ *ftsX* and  $\Delta$ *ftsE* mutants of *B. subtilis* show similar IC<sub>50</sub> values to CXCL10  
185 or N-CXCL10 as the *ftsE*<sup>+</sup> *ftsX*<sup>+</sup> parent. CFU survival assays were performed as  
186 described in Materials and Methods. (A) *ftsX*<sup>+</sup> parent (IU12153; black circles) and  
187  $\Delta$ *ftsX*::Tn10 *spec* (IU12165; red squares) mutant of *B. subtilis* in NPB buffer. Data  
188 shown was obtained from one experiment with duplicate wells. (B) and (C), assays in  
189 TGS buffer, parent (IU12153; black),  $\Delta$ *ftsX* (IU12981; red) and *ftsE*::Tn10 *spec*  
190 (IU12166; blue). n indicates the number of independent experiments. IC<sub>50</sub> and 95% CI  
191 values in comparison with other assay conditions are included in Table S3. (D) and (E)  
192  $3 \times 10^4$  CFU per reaction of *Bsu* parent and  $\Delta$ *ftsX* strains in DMEM +10% (vol/vol) FBS  
193 with indicated CXCL10 concentrations were incubated for 3.4 h statically in 96-well  
194 plates at 37°C in 5% CO<sub>2</sub> before the addition of resazurin dye. Fluorescence was  
195 measured (shown in D) and cells were serially diluted and plated for CFU survival assay  
196 (shown in E) at 5.2 h. Results included in Table S3.

197 **Fig. S8.** CXCL10 does not show antimicrobial activity against *Spn* D39 in DMEM  $\pm$   
198 10% (vol/vol) FBS. (A) *Spn* D39 (IU1690) was incubated in DMEM +10% (vol/vol) FBS

199 with 11.6  $\mu$ M CXCL10 (three independent experiments with duplicate wells) or various  
200 concentrations of nisin (one experiment with duplicate wells) and assayed with a  
201 fluorescence-based antimicrobial assay as described in Materials and Methods.  
202 Statistical significance was determined using Mann-Whitney t-test of CXCL10-treated vs  
203 untreated sample. \*\*,  $p < 0.01$ . (B) *Spn* D39 (IU1690) was incubated in DMEM with no  
204 FBS with 3.5  $\mu$ M CXCL10 or 3  $\mu$ M nisin for 3.8 h. Resazurin dye was then added,  
205 fluorescence was measured 2 h later (top panel), and cells were serially diluted and  
206 plated for CFU (bottom panel). Numbers on bars indicate the percentage of  
207 fluorescence relative to the untreated sample (top panel) or  $10^7$  CFU/mL (bottom panel).  
208 This experiment was performed once with duplicate wells.

## 209 210 SUPPLEMENTAL REFERENCES

- 211 1. **Lanie JA, Ng WL, Kazmierczak KM, Andrzejewski TM, Davidsen TM, Wayne KJ,**  
212 **Tettelin H, Glass JI, Winkler ME.** 2007. Genome sequence of Avery's virulent  
213 serotype 2 strain D39 of *Streptococcus pneumoniae* and comparison with that of  
214 unencapsulated laboratory strain R6. *J Bacteriol* **189**:38-51.
- 215 2. **Ramos-Montanez S, Tsui HC, Wayne KJ, Morris JL, Peters LE, Zhang F,**  
216 **Kazmierczak KM, Sham LT, Winkler ME.** 2008. Polymorphism and regulation  
217 of the *spxB* (pyruvate oxidase) virulence factor gene by a CBS-HotDog domain  
218 protein (SpxR) in serotype 2 *Streptococcus pneumoniae*. *Mol Microbiol* **67**:729-  
219 746.  
220

- 221 3. **Sham LT, Jensen KR, Bruce KE, Winkler ME.** 2013. Involvement of FtsE ATPase  
222 and FtsX extracellular loops 1 and 2 in FtsEX-PcsB complex function in cell  
223 division of *Streptococcus pneumoniae* D39. *MBio* **4**:e00431-13.
- 224 4. **Zheng JJ, Perez AJ, Tsui HT, Massidda O, Winkler ME.** 2017. Absence of the  
225 KhpA and KhpB (JAG/EloR) RNA-binding proteins suppresses the requirement  
226 for PBP2b by overproduction of FtsA in *Streptococcus pneumoniae* D39. *Mol*  
227 *Microbiol* **106**:793-814.
- 228 5. **Tettelin H, Nelson KE, Paulsen IT, Eisen JA, Read TD, Peterson S, Heidelberg**  
229 **J, DeBoy RT, Haft DH, Dodson RJ, Durkin AS, Gwinn M, Kolonay JF, Nelson**  
230 **WC, Peterson JD, Umayam LA, White O, Salzberg SL, Lewis MR, Radune D,**  
231 **Holtzapple E, Khouri H, Wolf AM, Utterback TR, Hansen CL, McDonald LA,**  
232 **Feldblyum TV, Angiuoli S, Dickinson T, Hickey EK, Holt IE, Loftus BJ, Yang**  
233 **F, Smith HO, Venter JC, Dougherty BA, Morrison DA, Hollingshead SK,**  
234 **Fraser CM.** 2001. Complete genome sequence of a virulent isolate of  
235 *Streptococcus pneumoniae*. *Science* **293**:498-506.
- 236 6. **Zafar MA, Kono M, Wang Y, Zangari T, Weiser JN.** 2016. Infant Mouse Model for  
237 the Study of Shedding and Transmission during *Streptococcus pneumoniae*  
238 Monoinfection. *Infect Immun* **84**:2714-2722.
- 239 7. **Rajkovic A, Hummels KR, Witzky A, Erickson S, Gafken PR, Whitelegge JP,**  
240 **Faull KF, Kearns DB, Ibba M.** 2016. Translation Control of Swarming  
241 Proficiency in *Bacillus subtilis* by 5-Amino-pentanolyated Elongation Factor P. *J*  
242 *Biol Chem* **291**:10976-10985.

- 243 8. **Tsui HC, Keen SK, Sham LT, Wayne KJ, Winkler ME.** 2011. Dynamic distribution  
244 of the SecA and SecY translocase subunits and septal localization of the HtrA  
245 surface chaperone/protease during *Streptococcus pneumoniae* D39 cell division.  
246 MBio **2**:e00202-11.
- 247 9. **Tsui HC, Zheng JJ, Magallon AN, Ryan JD, Yunck R, Rued BE, Bernhardt TG,**  
248 **Winkler ME.** 2016. Suppression of a deletion mutation in the gene encoding  
249 essential PBP2b reveals a new lytic transglycosylase involved in peripheral  
250 peptidoglycan synthesis in *Streptococcus pneumoniae* D39. Mol Microbiol  
251 **100**:1039-1065.
- 252 10. **Tsui HT, Boersma MJ, Vella SA, Kocaoglu O, Kuru E, Peceny JK, Carlson EE,**  
253 **VanNieuwenhze MS, Brun YV, Shaw SL, Winkler ME.** 2014. Pbp2x localizes  
254 separately from Pbp2b and other peptidoglycan synthesis proteins during later  
255 stages of cell division of *Streptococcus pneumoniae* D39. Mol Microbiol **94**:21-  
256 40.

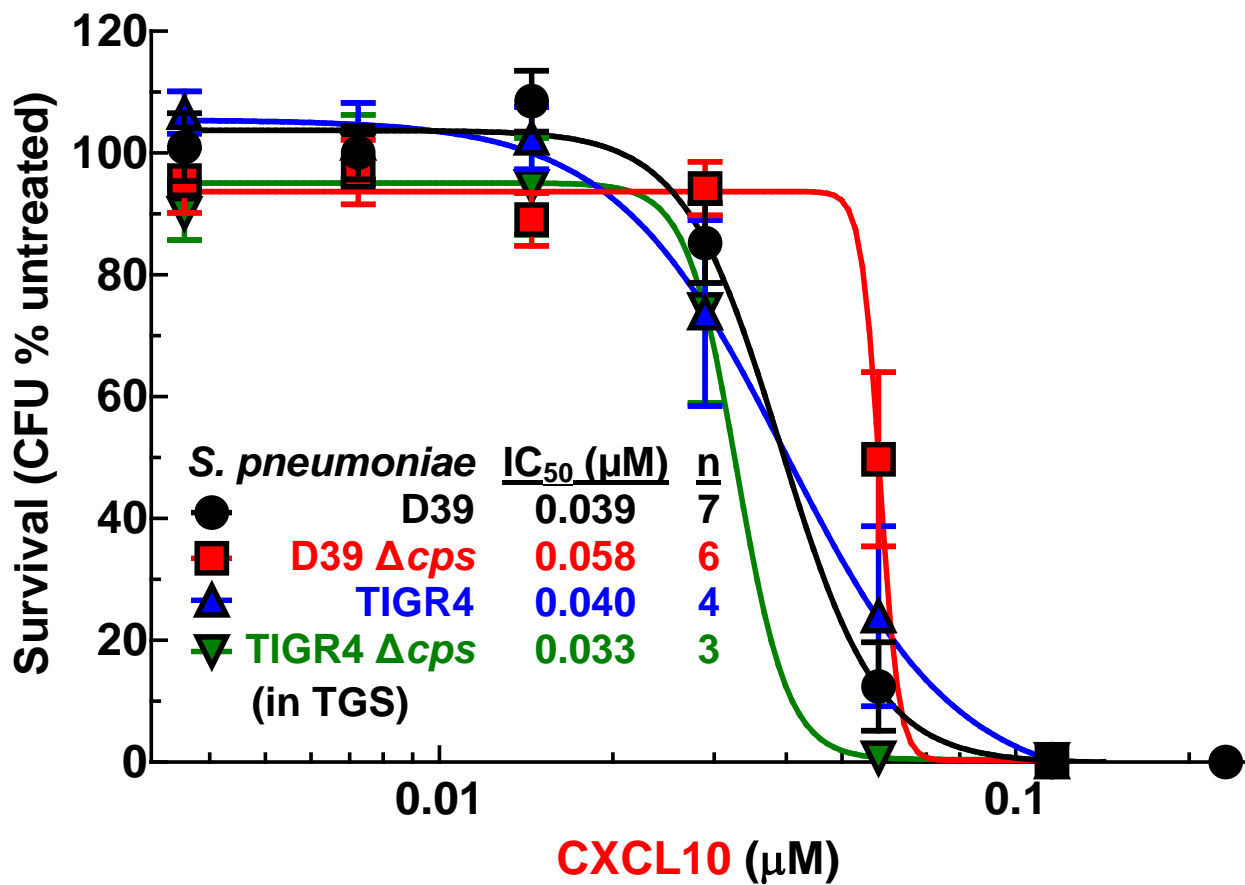

Fig. S1

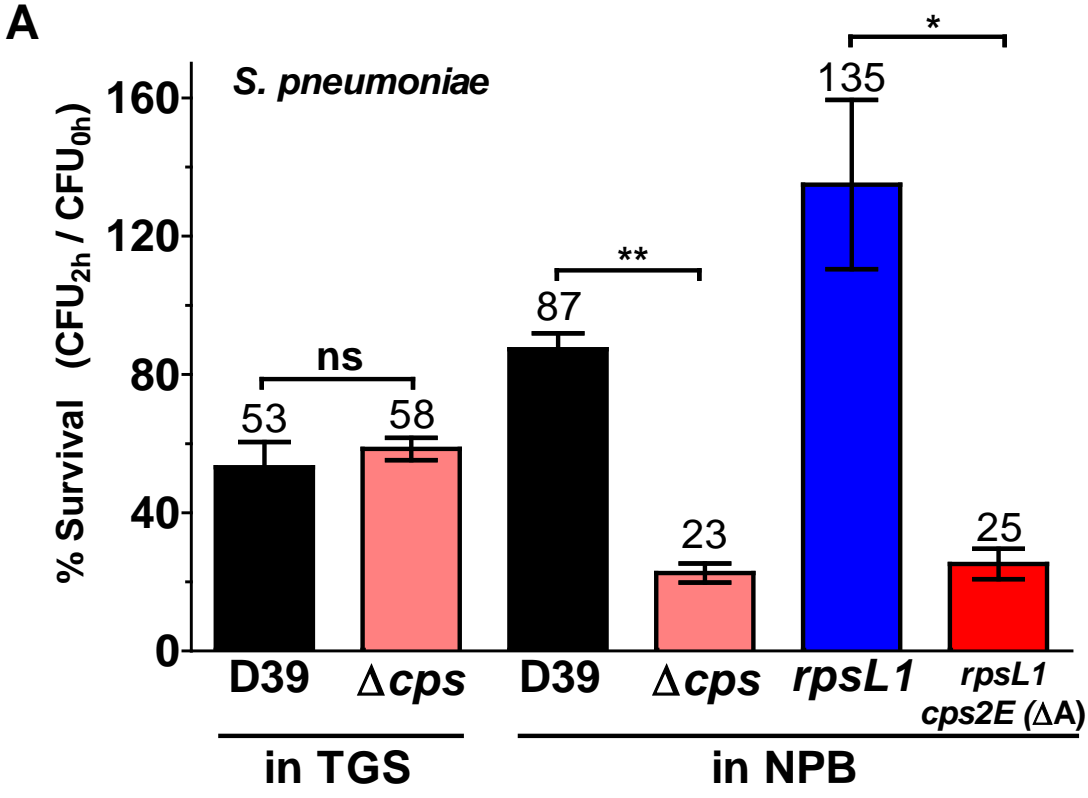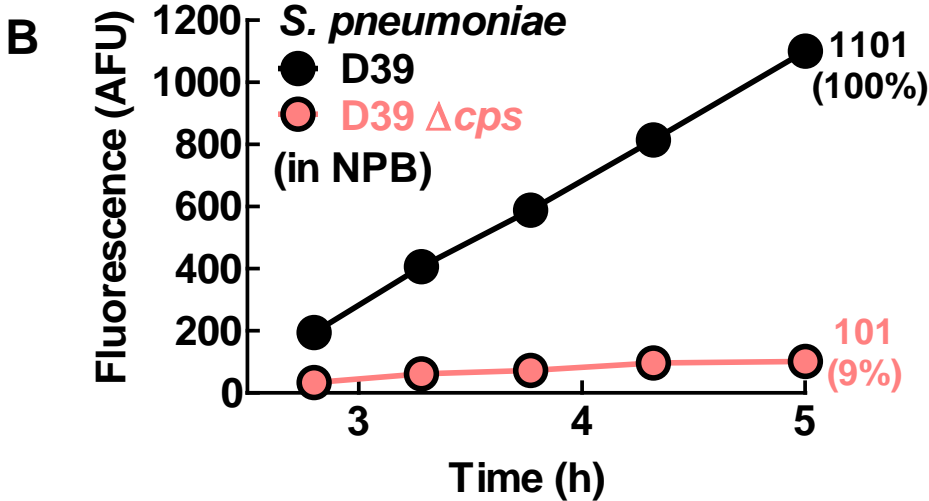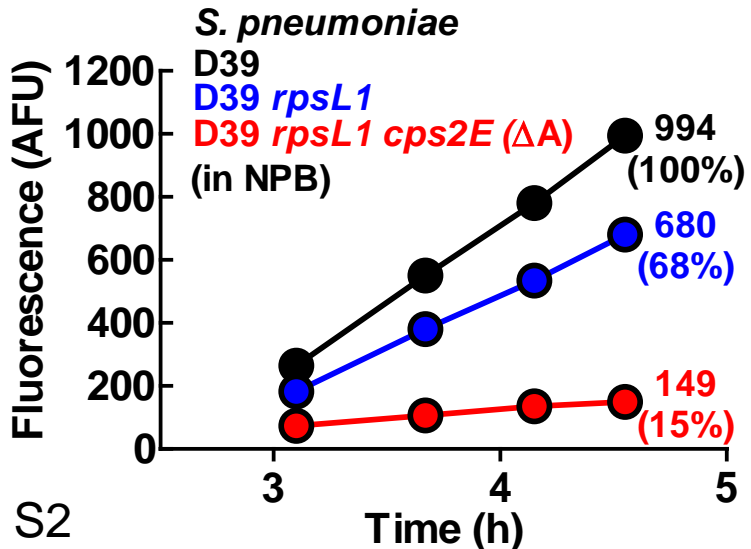

Fig. S2

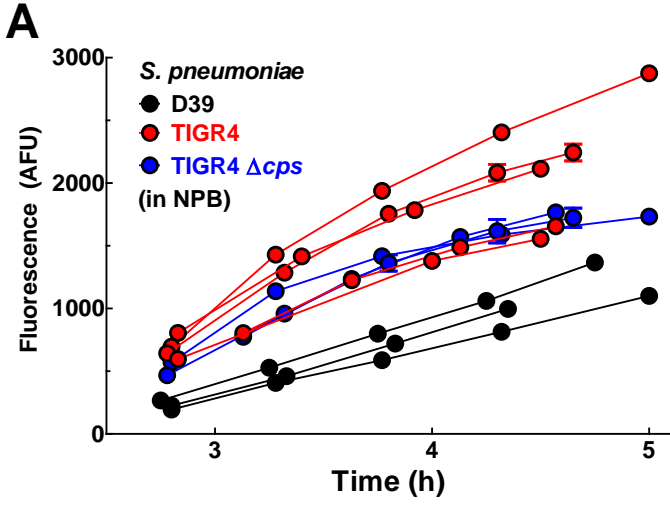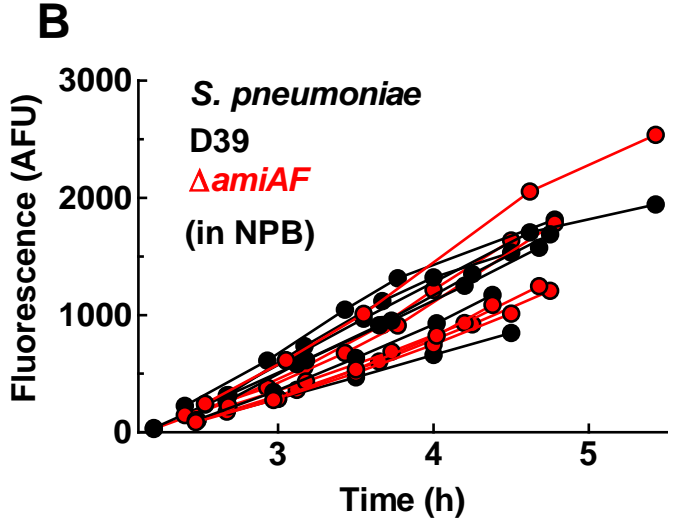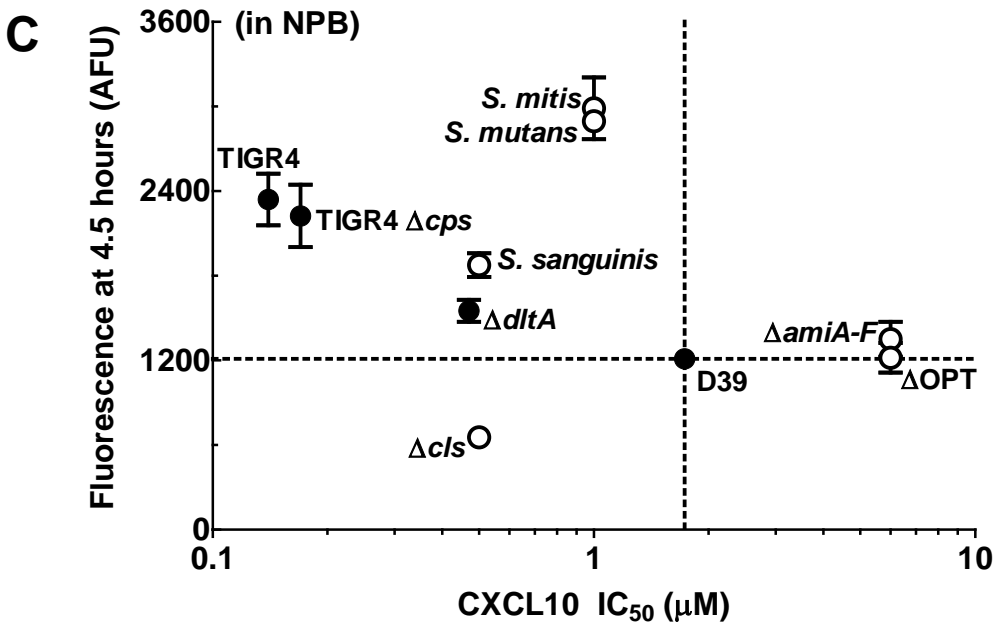

Different CXCL10 batches

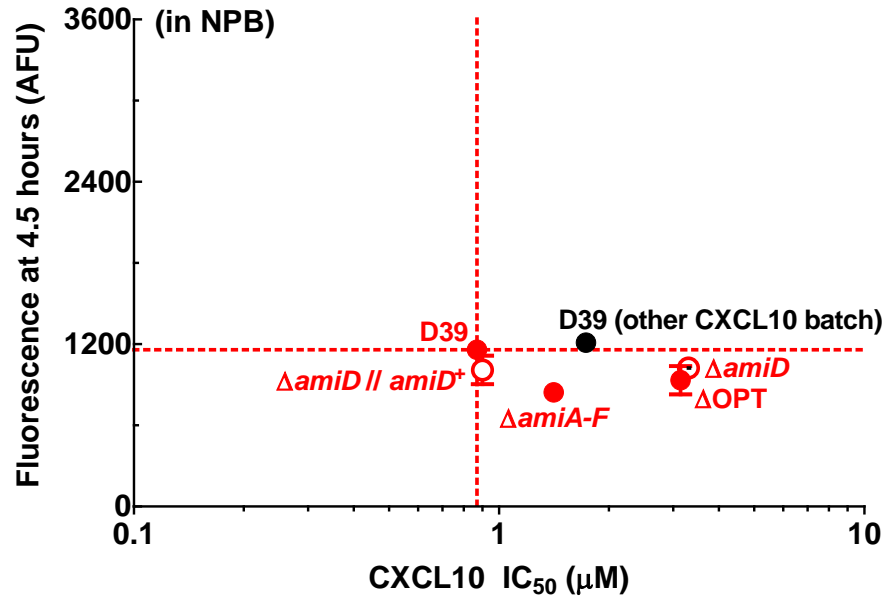

Fig. S3

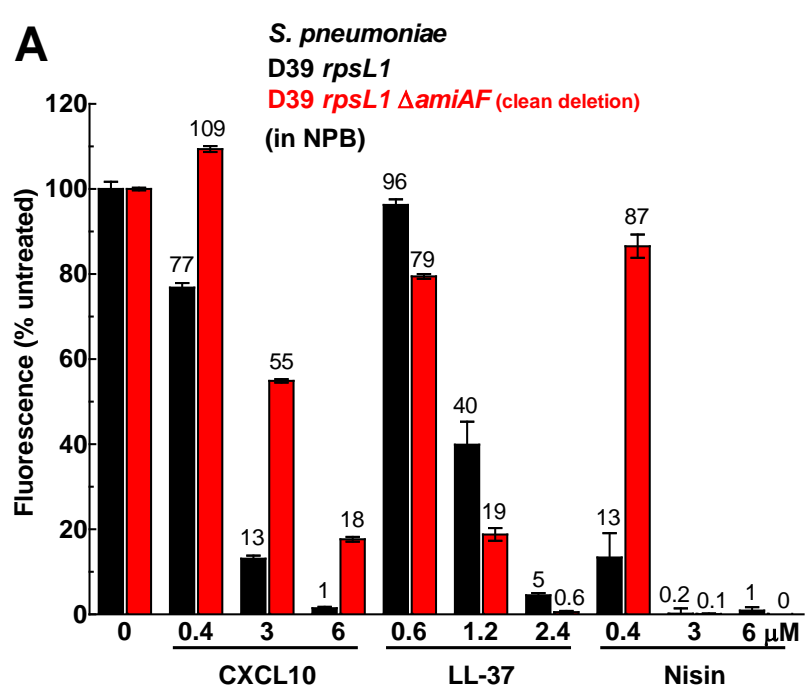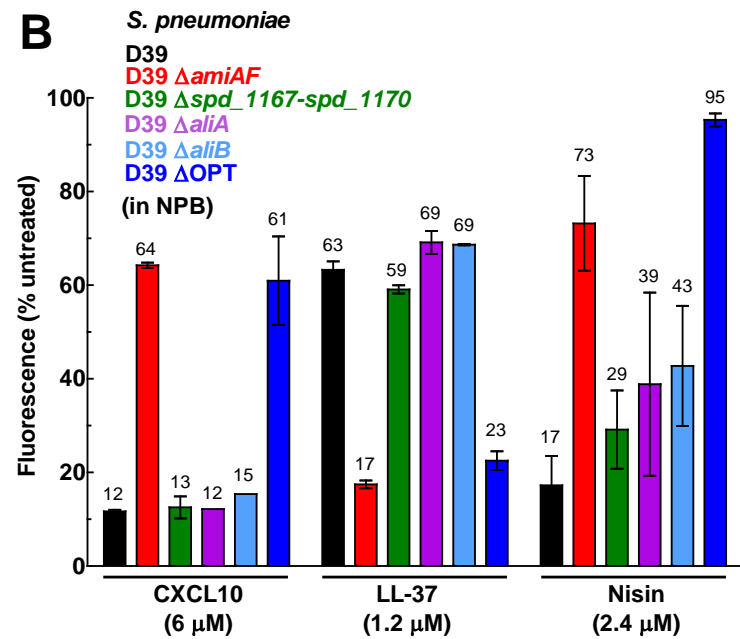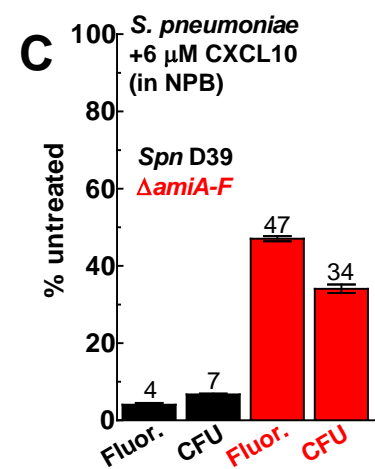

Fig. S4



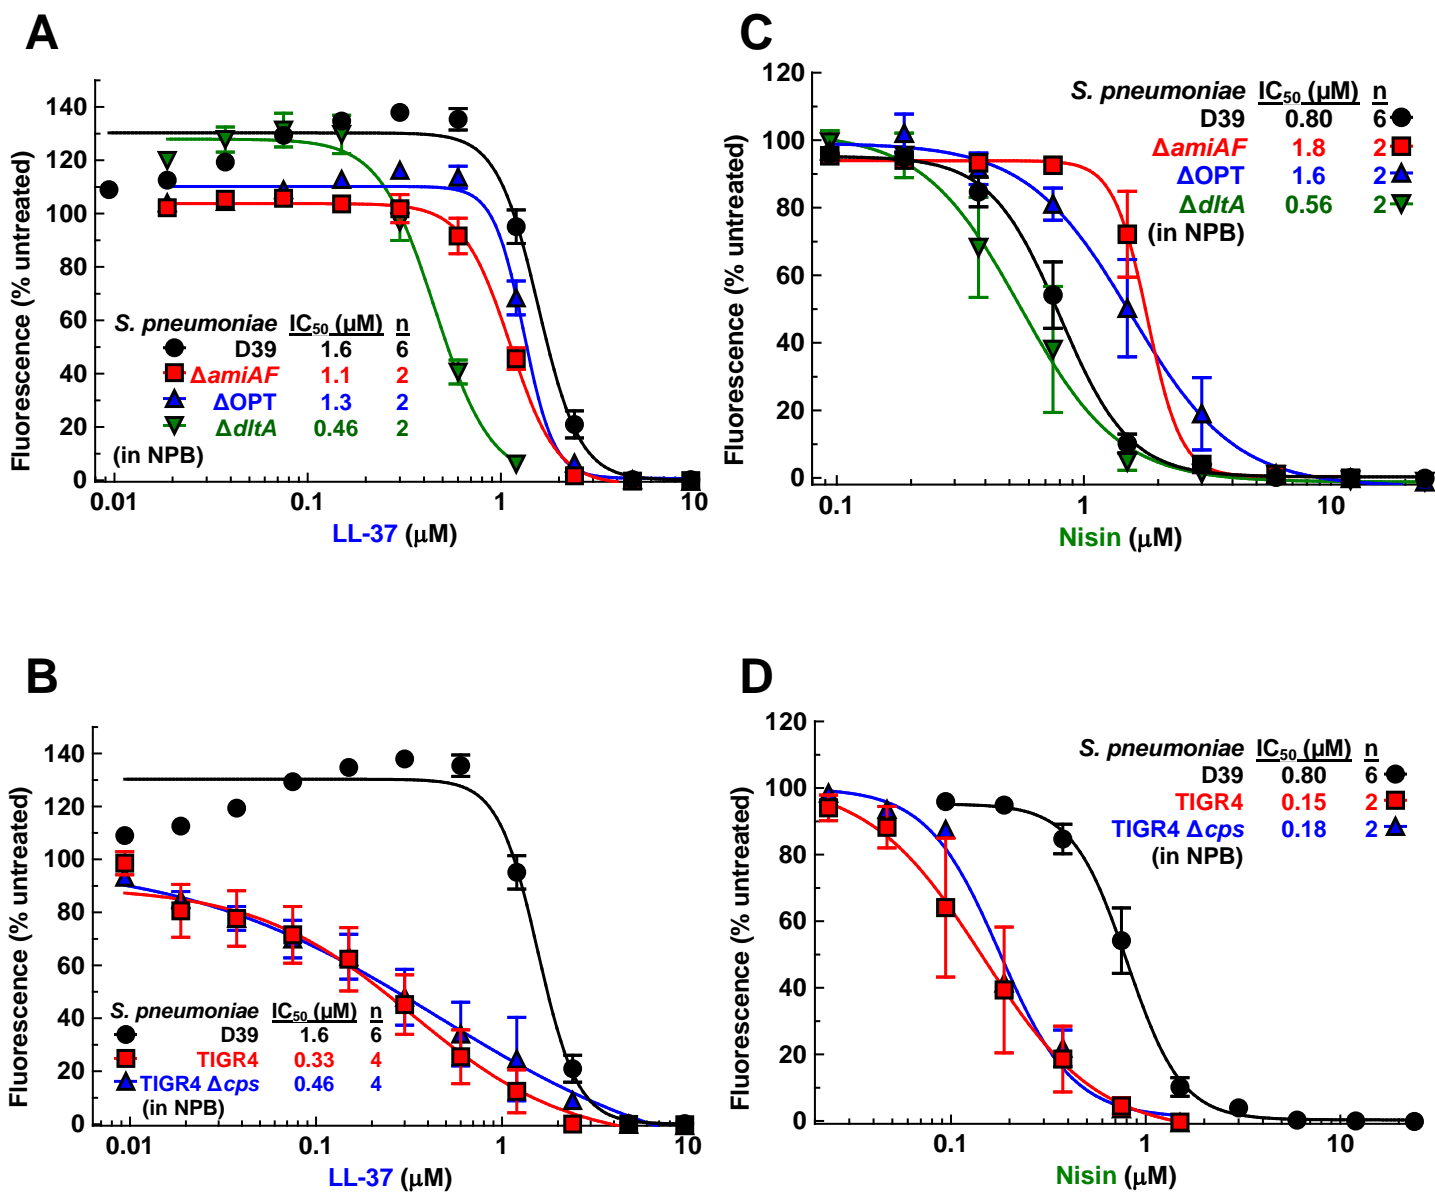

Fig. S5

**A**

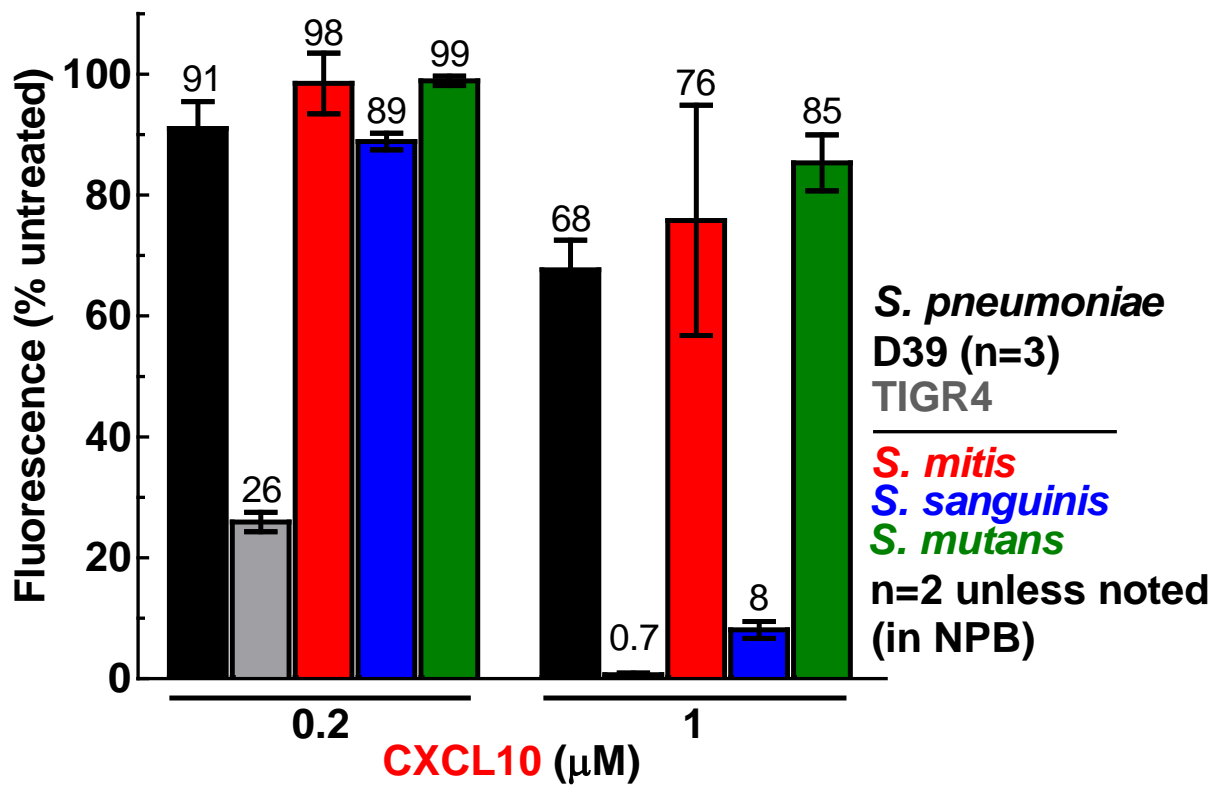

**B**

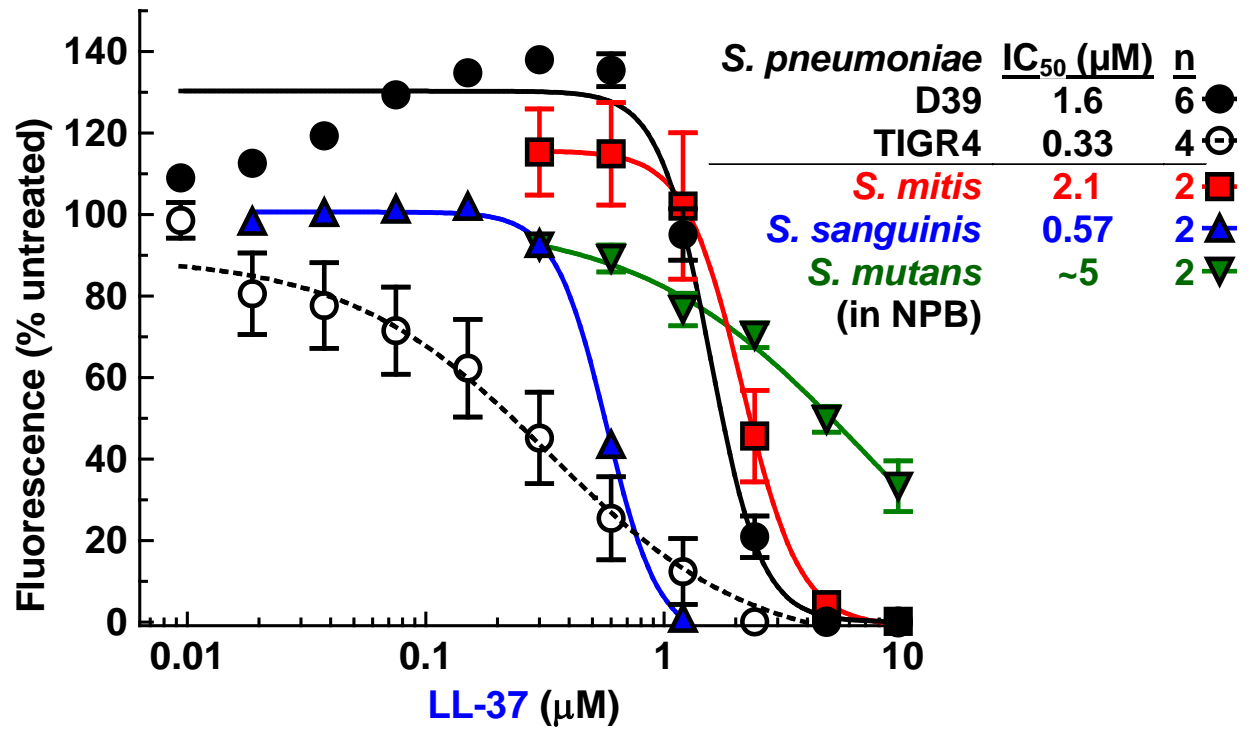

Fig. S6

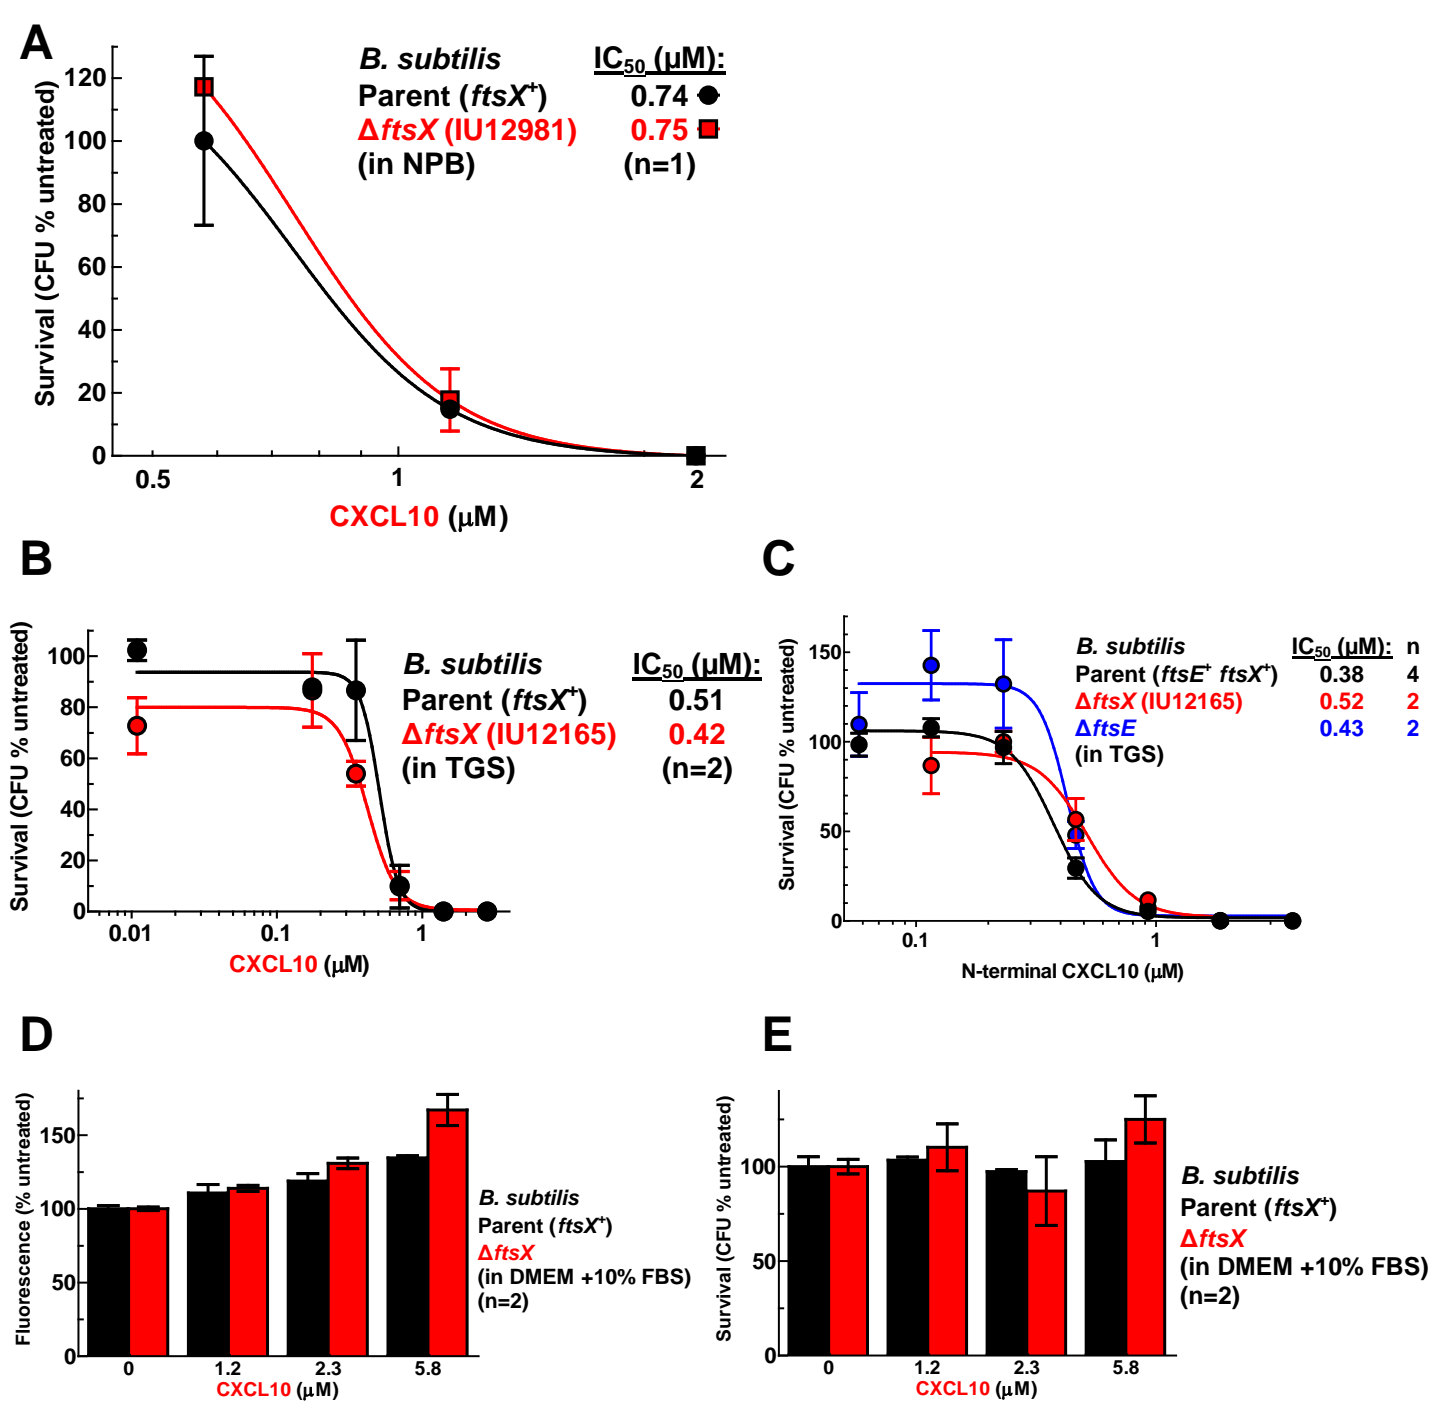

Fig. S7

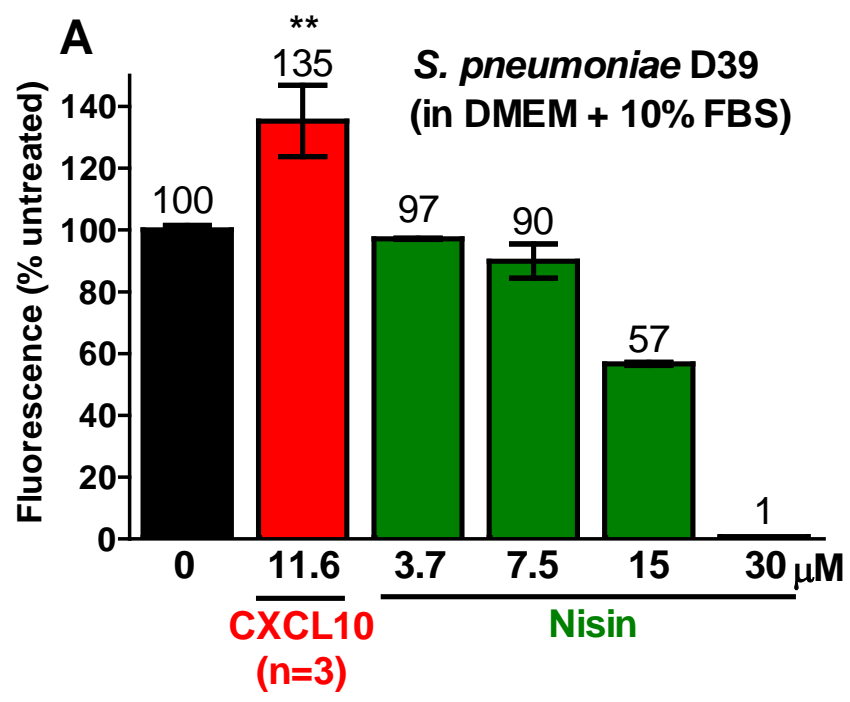

*S. pneumoniae* D39  
(in DMEM, no FBS)

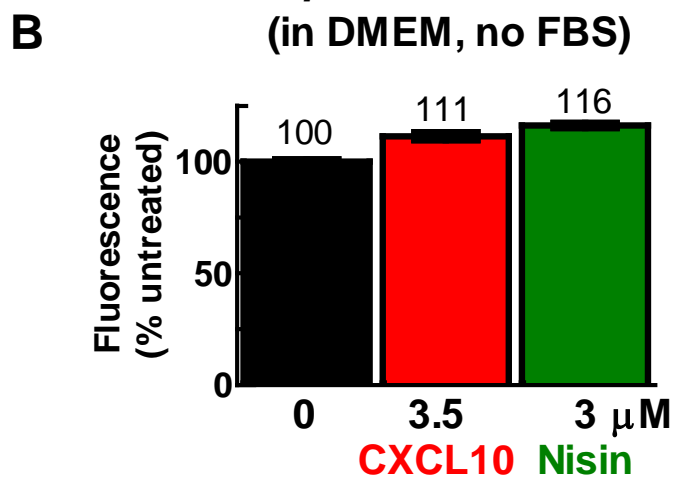

Incubation (h)

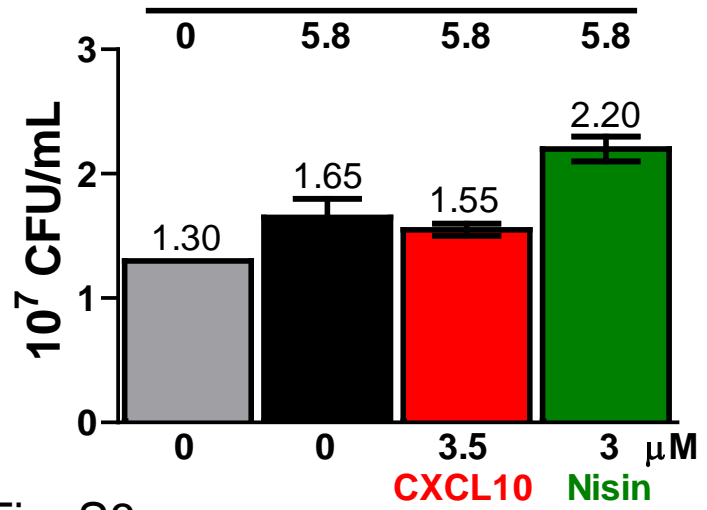

Fig. S8
